# Supplementary material for: A practical method for the aziridination of α,β-unsaturated carbonyl compounds with a simple carbamate utilizing sodium hypochlorite pentahydrate
Source: Royal Society of Chemistry journal article supplement (doi:10.1039/d1ra04297a), 2021-01-01
Supplement: d1ra04297a1.pdf [file d1ra04297a1.pdf]

## Supplementary Information

### **Practical aziridination of $\alpha,\beta$ -unsaturated carbonyl compounds with a simple carbamate utilizing sodium hypochlorite pentahydrate**

Takehiro Umeda and Satoshi Minakata\*

Department of Applied Chemistry, Graduate School of Engineering, Osaka University,  
Yamadaoka 2-1, Suita, Osaka 565-0871, Japan.  
e-mail: minakata@chem.eng.osaka-u.ac.jp

#### **Table of Contents**

|                                                                                          |           |
|------------------------------------------------------------------------------------------|-----------|
| <b>1. Materials and General.....</b>                                                     | <b>S2</b> |
| <b>2. Preparation of <i>tert</i>-butyl <i>N</i>-chloro-<i>N</i>-sodio-carbamate.....</b> | <b>S2</b> |
| <b>3. Preparation of <i>electron deficient olefins</i>.....</b>                          | <b>S2</b> |
| <b>4. Preparation of <i>chiral ammonium catalysts</i>.....</b>                           | <b>S3</b> |
| <b>5. Typical procedure for aziridination of acrylates.....</b>                          | <b>S3</b> |
| <b>6. Typical procedure for aziridination of electron-deficient olefins.....</b>         | <b>S3</b> |
| <b>7. Product data.....</b>                                                              | <b>S4</b> |
| <b>8. References.....</b>                                                                | <b>S8</b> |
| <b>9. NMR &amp; HPLC data.....</b>                                                       | <b>S9</b> |

## 1. Materials and General

Unless otherwise noted, all reactions were performed in two-neck glass tubes under a nitrogen atmosphere. Concentration of solution was carried out by using a rotary evaporator and generally followed by removal of residual solvents on a vacuum line held at 0.1–1 torr. Products were purified by chromatography on silica gel BW-300 (Fuji Silysia Chemical Ltd.). Commercial reagents and solvents were purchased from Sigma Aldrich, TCI, FUJIFILM Wako Chemicals, nacalai tesque, Iharanikkei Chemical Industry and Kanto Chemical and used as received with the following exceptions: acetonitrile was used from a solvent purification system. Analytical thin-layer chromatography (TLC) was performed on pre-coated silica gel glass plates (Merck silica gel 60 F<sub>254</sub>, 0.25 mm thickness). Compounds were visualized with UV lamp or treatment with an ethanolic solution of phosphomolybdic acid followed by heating or exposure to an iodine atmosphere. <sup>1</sup>H and <sup>13</sup>C NMR spectra were recorded on a JEOL JMTC-400/54/SS spectrometer (<sup>1</sup>H NMR, 400 MHz; <sup>13</sup>C NMR, 100 MHz). <sup>1</sup>H NMR chemical shifts for CDCl<sub>3</sub> were determined relative to Me<sub>4</sub>Si (0.0 ppm) as an internal standard. Infrared spectra were recorded on a SHIMADZU IRAffinity-1 FT-IR Spectrometer. High-resolution mass spectra were obtained on a JEOL JMS-DX303HF mass spectrometer. Melting points were determined on a Stanford Research Systems MPA100 OptiMelt Automated Melting Point System. Chiral-phase high-performance liquid chromatography (HPLC) was performed on a SHIMADZU prominence series instruments equipped with chiral columns.

## 2. Preparation of *tert*-butyl *N*-chloro-*N*-sodio-carbamate

Sodium hypochlorite pentahydrate (493.5 mg, 3 mmol) was added to a stirring solution of *tert*-butyl carbamate (351.5 mg, 3 mmol) at room temperature under a nitrogen atmosphere in MeCN (10 mL). The reaction mixture was stirred at room temperature for 3 h. After stirring, acetonitrile was removed from the resulting suspension by rotary evaporator. The residual solid was washed with Et<sub>2</sub>O (40 mL). The resulting suspension was filtered by washing with ether and the solid was dried to give the pure product (466.7 mg; 90%).

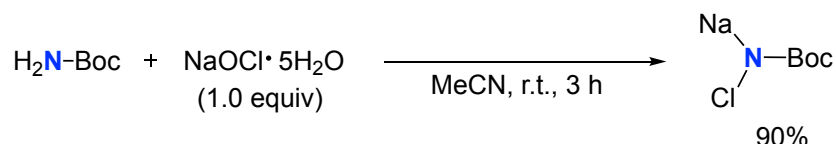

## 3. Preparation of *electron deficient olefins*

Acrylates **1a**, **1e** and **1f** were prepared according to the literature procedures.<sup>1</sup>  $\alpha,\beta$ -Unsaturated carbonyl compounds **1g**,<sup>2</sup> **1h**,<sup>3</sup> **1i**,<sup>4</sup> **1j**<sup>5</sup> and **1l**<sup>6</sup> were prepared by the known procedures.

#### 4. Preparation of *chiral ammonium catalysts*

Ammonium catalysts **CN1** and **CD1** were synthesized by the literature procedures.<sup>6,7</sup>

#### 5. Typical procedure for aziridination of acrylates

Potassium carbonate was ground in a mortar and then dried under reduced pressure at 200 °C prior to use. A heat-gun-dried 10 mL reaction flask containing a magnetic stir bar was charged with K<sub>2</sub>CO<sub>3</sub> (4.5 mmol), BnEt<sub>3</sub>N<sup>+</sup>Cl<sup>-</sup> (0.025 mmol), *tert*-butyl carbamate (0.7 mmol), acrylate (0.5 mmol), and MeCN (2 mL). To the mixture, NaOCl·5H<sub>2</sub>O (0.7 mmol) was added, and the mixture was stirred at room temperature for the indicated time on the benchtop. The reaction mixture was quenched by Na<sub>2</sub>S<sub>2</sub>O<sub>3</sub> aq. (1 M, 10 mL), and extracted with CH<sub>2</sub>Cl<sub>2</sub> (3 x 30 mL). Collected organic layers were dried over anhydrous Na<sub>2</sub>SO<sub>4</sub>. The solution was concentrated under reduced pressure to give the crude product. Purification by flash column chromatography on silica gel gave the pure product.

#### 6. Typical procedure for aziridination of electron-deficient olefins

Potassium carbonate was ground in a mortar and then dried under reduced pressure at 200 °C prior to use. A heat-gun-dried 10 mL reaction flask containing a magnetic stir bar was charged with K<sub>2</sub>CO<sub>3</sub> (4.5 mmol), BnEt<sub>3</sub>N<sup>+</sup>Cl<sup>-</sup> (0.025 mmol), *tert*-butyl carbamate (0.7 mmol), and MeCN (2 mL). To the mixture, NaOCl·5H<sub>2</sub>O (0.7 mmol) was added, and the mixture was stirred at room temperature. After stirring for 3 hours, electron-deficient olefin was added to the reaction mixture, followed by stirring at room temperature for the indicated time. The reaction mixture was quenched by Na<sub>2</sub>S<sub>2</sub>O<sub>3</sub> aq. (1 M, 10 mL), and extracted with CH<sub>2</sub>Cl<sub>2</sub> (3 x 30 mL). Collected organic layers were dried over anhydrous Na<sub>2</sub>SO<sub>4</sub>. The solution was concentrated under reduced pressure to give the crude product. Purification by flash column chromatography on silica gel gave the pure product.

## 7. Product data

### 2-Benzyloxycarbonyl-1-*tert*-butoxycarbonylaziridine (2a).

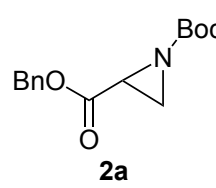**2a** 113.6 mg (82%); Colorless oil;  $R_f$  = 0.30 (hexane/EtOAc, 8:2, v/v, silica gel plate); HPLC (Daicel Chiralcel IA, hexane/2-propanol, 99:1, 0.2 mL/min, 254 nm, 30 °C)  $t$  = 56.8 and 61.7 min; IR (neat) 2980, 1744, 1724, 1152  $\text{cm}^{-1}$ ;  $^1\text{H}$  NMR (400 MHz,  $\text{CDCl}_3$ )  $\delta$  1.43 (s, 9H), 2.40 (dd, 1H,  $J$  = 1.5, 5.4 Hz), 2.54 (dd, 1H,  $J$  = 1.5, 3.5 Hz), 3.07 (dd, 1H,  $J$  = 3.5, 5.4 Hz), 5.16 and 5.24 (1H and 1H, AB system,  $J$  = 12.4 Hz), 7.34-7.38 (m, 5H);  $^{13}\text{C}$  NMR (100 MHz,  $\text{CDCl}_3$ ) 27.7, 31.3, 34.8, 67.3, 82.0, 128.3, 128.4, 128.5, 135.0, 159.4, 168.3; MS (FAB)  $m/z$  278 ( $[\text{M}+\text{H}]^+$ , 20), 222 (34), 178 (80), 107 (5), 91 (100), 57 (60); HRMS (FAB) calcd for ( $\text{C}_{15}\text{H}_{20}\text{NO}_4$ ) 278.1387 ( $[\text{M} + \text{H}]^+$ ), found  $m/z$  278.1391.

### Benzyl 3-(*tert*-butoxycarbonylamino)propionate (3a).

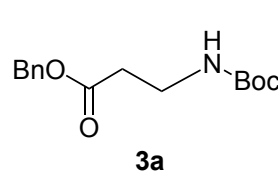**3a** Colorless oil;  $R_f$  = 0.23 (hexane/EtOAc, 8:2, v/v, silica gel plate); IR (neat) 3375, 2978, 1732, 1713, 1163  $\text{cm}^{-1}$ ;  $^1\text{H}$  NMR (400 MHz,  $\text{CDCl}_3$ )  $\delta$  1.43 (s, 9H), 2.57 (t, 2H,  $J$  = 6.0 Hz), 3.40 (q, 2H,  $J$  = 6.0 Hz), 5.12 (s, 3H, overlap with NH), 7.30-7.41 (m, 5 H);  $^{13}\text{C}$  NMR (100 MHz,  $\text{CDCl}_3$ ) 28.2, 34.4, 35.9, 66.3, 79.1, 128.0, 128.2, 128.4, 135.5, 155.6, 172.1; MS (CI)  $m/z$  280 ( $[\text{M}^++\text{H}]$ , 3), 224 (100), 180 (33), 91 (9); HRMS (CI) calcd for ( $\text{C}_{15}\text{H}_{22}\text{NO}_4$ ) 280.1543 ( $[\text{M}+\text{H}]^+$ ), found  $m/z$  280.1553.

### 1,2-Bis(benzyloxycarbonyl)aziridine (2a').

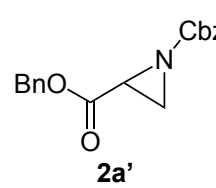**2a'** 51.6 mg (32%); Colorless oil;  $R_f$  = 0.40 (hexane/EtOAc, 7:3, v/v, silica gel plate); IR (neat) 3034, 1728, 1215, 1173  $\text{cm}^{-1}$ ;  $^1\text{H}$  NMR (400 MHz,  $\text{CDCl}_3$ )  $\delta$  2.48 (dd, 1H,  $J$  = 1.3, 5.4 Hz), 2.62 (dd, 1H,  $J$  = 1.3, 3.1 Hz), 3.14 (dd, 1H,  $J$  = 3.1, 5.4 Hz), 5.06-5.17 (m, 4H), 7.32-7.39 (m, 10H);  $^{13}\text{C}$  NMR (100 MHz,  $\text{CDCl}_3$ ) 31.5, 34.9, 67.6, 68.6, 128.4, 128.5, 128.5, 128.5, 128.6, 128.7, 134.8, 135.3, 160.7, 168.1; MS (FAB)  $m/z$  312 ( $[\text{M}+\text{H}]^+$ , 16), 178 (9), 107 (10), 91 (100), 77 (6); HRMS (FAB) calcd for ( $\text{C}_{18}\text{H}_{18}\text{NO}_4$ ) 312.1230 ( $[\text{M}+\text{H}]^+$ ), found  $m/z$  312.1241.

### 1-*tert*-Butoxycarbonyl-2-methoxycarbonylaziridine (**2b**).

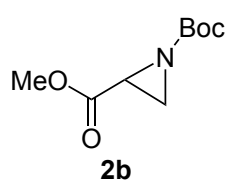

The analytical data for this compound were in excellent agreement with the reported data<sup>8,9</sup>. 67.7 mg (60%); Colorless oil; HPLC (Daicel Chiralcel IA, hexane/2-propanol, 95:5, 0.3 mL/min, RI detector, 30 °C)  $t = 17.7$  and 19.3 min;  $^1\text{H NMR}$  (400 MHz,  $\text{CDCl}_3$ )  $\delta = 1.46$  (s, 9H), 2.42 (dd, 1H,  $J = 1.4, 5.4$  Hz), 2.53 (dd, 1H,  $J = 1.4, 3.4$  Hz), 3.04 (dd, 1H,  $J = 3.4, 5.4$  Hz), 3.78 (s, 3H);  $^{13}\text{C NMR}$  (100 MHz,  $\text{CDCl}_3$ )  $\delta 27.8, 31.3, 34.8, 52.6, 82.1, 159.5, 168.9$ .

### 2-Ethoxycarbonyl-1-*tert*-butoxycarbonylaziridine (**2c**).

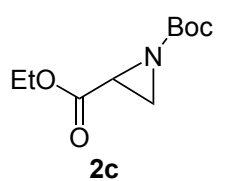

60.1 mg (55%); Colorless oil;  $R_f = 0.38$  (hexane/EtOAc, 8:2, v/v, silica gel plate);  $^1\text{H NMR}$  (400 MHz,  $\text{CDCl}_3$ )  $\delta = 1.31$  (t, 3H,  $J = 6.8$  Hz), 1.46 (s, 9H), 2.40 (dd, 1H,  $J = 1.3, 5.3$  Hz), 2.52 (dd, 1H,  $J = 1.3, 3.0$  Hz), 3.02 (dd, 1H,  $J = 3.0, 5.3$  Hz), 4.16-4.32 (m, 2H);  $^{13}\text{C NMR}$  (100 MHz,  $\text{CDCl}_3$ )  $\delta 14.0, 27.9, 31.2, 34.9, 61.6, 82.0, 159.5, 168.4$ ; MS (FAB)  $m/z$  216 ( $[\text{M}+\text{H}]^+$ , 16), 160 (34), 57 (100); HRMS (FAB) calcd for ( $\text{C}_{10}\text{H}_{18}\text{NO}_4$ ) 216.1230 ( $[\text{M}+\text{H}]^+$ ), found  $m/z$  216.1238.

### 1,2-Bis(*tert*-butoxycarbonyl) aziridine (**2d**).

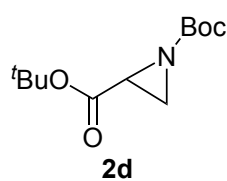

42.2 mg (35%); Colorless oil;  $R_f = 0.29$  (hexane/EtOAc, 8:2, v/v, silica gel plate); IR (neat) 2980, 1736, 1724, 1147  $\text{cm}^{-1}$ ;  $^1\text{H NMR}$  (400 MHz,  $\text{CDCl}_3$ )  $\delta = 1.46$  (s, 9H), 1.50 (s, 9H), 2.32 (dd, 1H,  $J = 1.6, 5.2$  Hz), 2.47 (dd, 1H,  $J = 1.6, 3.0$  Hz), 2.93 (dd, 1H,  $J = 3.0, 5.2$  Hz);  $^{13}\text{C NMR}$  (100 MHz,  $\text{CDCl}_3$ )  $\delta 27.8, 27.9, 30.9, 35.7, 81.8, 82.4, 159.7, 167.4$ ; MS (FAB)  $m/z$  244 ( $[\text{M}+\text{H}]^+$ , 28), 188 (32), 57 (100); HRMS (FAB) calcd for ( $\text{C}_{12}\text{H}_{22}\text{NO}_4$ ) 244.1543 ( $[\text{M}+\text{H}]^+$ ), found  $m/z$  244.1550.

### 1-*tert*-Butoxycarbonyl-2-*o*-methoxybenzyloxycarbonylaziridine (**2e**).

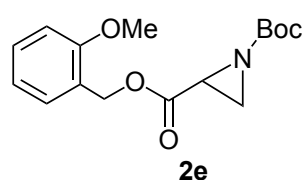

114.2 mg (75%); Colorless oil;  $R_f = 0.22$  (hexane/EtOAc, 8:2, v/v, silica gel plate); IR (neat) 2978, 1742, 1724, 1248, 1152, 754  $\text{cm}^{-1}$ ;  $^1\text{H NMR}$  (400 MHz,  $\text{CDCl}_3$ )  $\delta 1.44$  (s, 9H), 2.40 (dd, 1H,  $J = 1.1, 5.4$  Hz), 2.54 (dd, 1H,  $J = 1.1, 3.3$  Hz), 3.07 (dd, 1H,  $J = 3.3, 5.4$  Hz), 3.84 (s, 3H), 5.23 and 5.29 (1H and 1H, AB system,  $J = 12.2$  Hz), 6.89-6.97 (m, 2H), 7.28-7.35 (m, 2H);  $^{13}\text{C NMR}$  (100 MHz,  $\text{CDCl}_3$ ) 27.7, 31.3, 34.8, 55.3, 62.8, 81.9, 110.4, 120.3, 123.3, 129.9, 130.0, 157.5, 159.5, 168.3; MS (FAB)  $m/z$  328 ( $[\text{M}+\text{Na}]^+$ , 5), 308 ( $[\text{M}+\text{H}]^+$ , 4), 121 (100); HRMS (FAB) calcd for ( $\text{C}_{16}\text{H}_{21}\text{NO}_5$ ) 307.1420 ( $\text{M}^+$ ), found  $m/z$  307.1414.

### 9[1-*tert*-butoxycarbonylaziridin-2'-yl]carbonyloxymethyl]anthracene (2f).

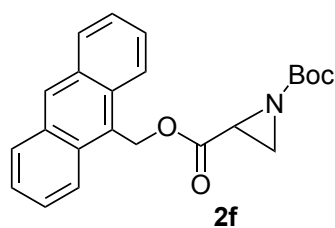

107.9 mg (57%); Pale yellow solid; mp 42.1–46.1 °C;  $R_f$  = 0.18 (hexane/EtOAc, 5:1, v/v, silica gel plate); HPLC (Daicel Chiralcel IB, hexane/2-propanol, 99:1, 1.0 mL/min, 254 nm, 30 °C)  $t$  = 19.8 and 22.7 min; IR (neat) 2976, 1732, 1304, 1192, 1157, 1144, 734  $\text{cm}^{-1}$ ;  $^1\text{H}$  NMR (400 MHz,  $\text{CDCl}_3$ )  $\delta$  1.39 (s, 9H), 2.35 (dd, 1H,  $J$  = 1.6, 5.1 Hz), 2.54 (dd, 1H,  $J$  = 1.6, 3.4 Hz), 3.02 (dd, 1H,  $J$  = 3.4, 5.1 Hz), 6.24 and 6.29 (1H and 1H, AB system,  $J$  = 12.6 Hz), 7.50 (t, 2H,  $J$  = 7.6 Hz), 7.59 (t, 2H,  $J$  = 7.8 Hz), 8.04 (d, 2H,  $J$  = 8.0 Hz), 8.35 (d, 2H,  $J$  = 8.8 Hz), 8.53 (s, 1H);  $^{13}\text{C}$  NMR (100 MHz,  $\text{CDCl}_3$ ) 27.8, 31.5, 34.9, 60.1, 82.1, 123.8, 125.2, 125.4, 126.8, 129.1, 129.5, 131.1, 131.4, 159.5, 168.7; MS (EI)  $m/z$  377 ( $\text{M}^+$ , 20), 207 (20), 191 (100); HRMS (EI) calcd for ( $\text{C}_{23}\text{H}_{23}\text{NO}_4$ ) 377.1627 ( $\text{M}^+$ ), found  $m/z$  377.1622.

### 2-Benzoyl-1-*tert*-butoxycarbonylaziridine (2g).

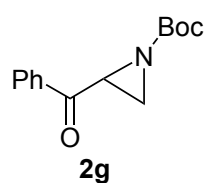

114.6 mg (87%); Colorless oil;  $R_f$  = 0.31 (hexane/EtOAc, 8:2, v/v, silica gel plate); IR (neat) 2978, 1722, 1682, 1227, 1153, 708  $\text{cm}^{-1}$ ;  $^1\text{H}$  NMR (400 MHz,  $\text{CDCl}_3$ )  $\delta$  1.45 (s, 9H), 2.53 (dd, 1H,  $J$  = 1.5, 5.4 Hz), 2.70 (dd, 1H,  $J$  = 1.5, 3.3 Hz), 3.94 (dd, 1H,  $J$  = 3.3, 5.4 Hz), 7.52 (t, 2H,  $J$  = 7.4 Hz), 7.63 (t, 1H,  $J$  = 7.2 Hz), 8.09 (d, 2H,  $J$  = 7.2 Hz);  $^{13}\text{C}$  NMR (100 MHz,  $\text{CDCl}_3$ ) 27.8, 32.5, 37.3, 81.9, 128.5, 128.7, 133.7, 136.4, 160.2, 193.5; MS (FAB)  $m/z$  248 ( $[\text{M}+\text{H}]^+$ , 39), 192 (70), 148 (100), 105 (53), 57 (70); HRMS (FAB) calcd for ( $\text{C}_{14}\text{H}_{18}\text{NO}_3$ ) 248.1281 ( $[\text{M}+\text{H}]^+$ ), found  $m/z$  248.1288.

### Oxirane-2-yl-(phenyl)-methanone (4g).

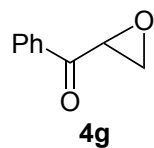

Colorless solid;  $R_f$  = 0.25 (hexane/EtOAc, 8:2, v/v, silica gel plate); IR (neat) 1684  $\text{cm}^{-1}$ ;  $^1\text{H}$  NMR (400 MHz,  $\text{CDCl}_3$ )  $\delta$  2.97 (dd, 1H,  $J$  = 2.7, 6.5 Hz), 3.13 (dd, 1H,  $J$  = 4.4, 6.5 Hz), 4.26 (dd, 1H,  $J$  = 2.7, 4.4 Hz), 7.51 (t, 2H,  $J$  = 7.8 Hz), 7.63 (t, 1H,  $J$  = 7.3 Hz), 8.04 (d, 2H,  $J$  = 7.3 Hz);  $^{13}\text{C}$  NMR (100 MHz,  $\text{CDCl}_3$ )  $\delta$  47.5, 50.9, 128.2, 128.7, 133.9, 135.2, 194.6; MS (CI)  $m/z$  (relative intensity, %) 149 ( $[\text{M}+\text{H}]^+$ , 100), 133 (6), 105 (8); HRMS (CI) calcd for ( $\text{C}_9\text{H}_9\text{O}_2$ ) 149.0597 ( $[\text{M}+\text{H}]^+$ ), found  $m/z$  149.0602.

**1-[(1'-*tert*-Butoxycarbonyl)aziridin-2'-yl]carbonyl]-3,5-dimethylpyrazole (2h).**

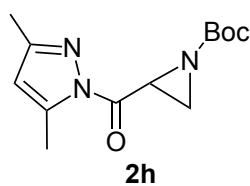

113.1 mg (85%); Colorless oil;  $R_f = 0.39$  (hexane/EtOAc, 8:2, v/v, silica gel plate); HPLC (Daicel Chiralcel OB-H, hexane/2-propanol, 99:1, 0.3 mL/min, 254 nm, 30 °C)  $t = 29.1$  and 49.1 min; IR (neat) 2978, 1728, 1337, 1153  $\text{cm}^{-1}$ ;  $^1\text{H NMR}$  (400 MHz,  $\text{CDCl}_3$ )  $\delta$  1.45 (s, 9H), 2.28 (s, 3H), 2.55 (s, 3H), 2.56-2.58 (m, 1H), 2.62 (dd, 1H,  $J = 1.4, 2.9$  Hz), 4.53 (dd, 1H,  $J = 2.9, 5.6$  Hz), 6.04 (s, 1H);  $^{13}\text{C NMR}$  (100 MHz,  $\text{CDCl}_3$ ) 13.8, 14.3, 27.9, 32.6, 34.7, 82.0, 111.8, 144.5, 153.2, 160.0, 167.4; MS (EI)  $m/z$  265 ( $\text{M}^+$ , 0.7), 164 (34), 57 (100); HRMS (EI) calcd for ( $\text{C}_{13}\text{H}_{19}\text{N}_3\text{O}_3$ ) 265.1426 ( $\text{M}^+$ ), found  $m/z$  265.1427.

**3-[(1'-*tert*-butoxycarbonyl)aziridin-2'-yl]carbonyl]-2-oxazolidinone (2i).**

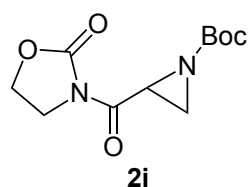

124.0 mg (96%); Colorless oil;  $R_f = 0.33$  (hexane/EtOAc, 1:1, v/v, silica gel plate); IR (neat) 2982, 1778, 1721, 1703, 1219, 1153  $\text{cm}^{-1}$ ;  $^1\text{H NMR}$  (400 MHz,  $\text{CDCl}_3$ )  $\delta$  1.46 (s, 9H), 2.53-2.56 (m, 2H), 4.02-4.13 (m, 2H), 4.45 (dd, 1H,  $J = 3.4, 5.8$  Hz), 4.50 (t, 2H,  $J = 8.0$  Hz);  $^{13}\text{C NMR}$  (100 MHz,  $\text{CDCl}_3$ ) 27.8, 32.6, 33.9, 42.7, 62.5, 82.1, 153.4, 159.7, 167.7 MS (FAB)  $m/z$  257 ( $[\text{M}+\text{H}]^+$ , 10), 201 (100), 157 (65), 57 ( $\text{tBu}$ , 58); HRMS (FAB) calcd for ( $\text{C}_{11}\text{H}_{17}\text{N}_2\text{O}_5$ ) 257.1132 ( $[\text{M}+\text{H}]^+$ ), found  $m/z$  257.1134.

**1-[(1'-*tert*-Butoxycarbonyl)aziridin-2'-yl]carbonyl]carbazole (2j).**

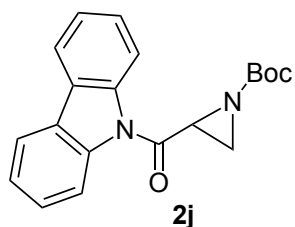

125.2 mg (76%); Colorless solid; mp 106.1–113.2 °C;  $R_f = 0.21$  (hexane/EtOAc, 9:1, v/v, silica gel plate); HPLC (Daicel Chiralcel IB, hexane/2-propanol, 9:1, 1.0 mL/min, 254 nm, 30 °C)  $t = 7.0$  and 9.9 min.; IR (neat) 2974, 1730, 1680, 1294, 1144, 754  $\text{cm}^{-1}$ ;  $^1\text{H NMR}$  (400 MHz,  $\text{CDCl}_3$ )  $\delta$  1.35 (s, 9H), 2.63 (d, 1H,  $J = 4.7$  Hz), 3.13 (d, 1H,  $J = 3.4$  Hz), 3.93 (dd, 1H,  $J = 3.4, 4.7$  Hz), 7.42 (t, 2H,  $J = 7.2$  Hz), 7.50 (t, 2H,  $J = 7.8$  Hz), 8.01 (d, 2H,  $J = 8.4$  Hz), 8.30 (d, 2H,  $J = 8.4$  Hz);  $^{13}\text{C NMR}$  (100 MHz,  $\text{CDCl}_3$ ) 27.8, 32.2, 38.1, 82.6, 115.8, 120.0, 124.0, 126.3, 127.3, 138.3, 159.7, 166.9; MS (FAB)  $m/z$  336 ( $\text{M}^+$ , 42), 281 (43), 237 (50), 167 (100), 57 (89); HRMS (FAB) calcd for ( $\text{C}_{20}\text{H}_{20}\text{N}_2\text{O}_3$ ) 336.1474 ( $\text{M}^+$ ), found  $m/z$  336.1475.

### 1-*tert*-Butoxycarbonyl-2-phenylsulfonylaziridine (**2k**).

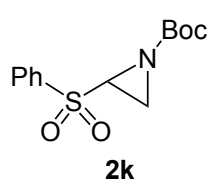

95.5 mg (66%); Colorless solid; mp 116.1–119.7 °C;  $R_f = 0.30$  (hexane/EtOAc, 7:3, v/v, silica gel plate); IR (neat) 3026, 1726, 1287, 1146  $\text{cm}^{-1}$ ;  $^1\text{H}$  NMR (400 MHz,  $\text{CDCl}_3$ )  $\delta = 1.26$  (s, 9H), 2.68 (d, 1H,  $J = 5.8$  Hz), 2.89 (d, 1H,  $J = 2.8$  Hz), 3.73 (dd, 1H,  $J = 2.8, 5.8$  Hz), 7.60 (t, 2H,  $J = 7.8$  Hz), 7.70 (t, 1H,  $J = 7.4$  Hz), 7.98 (d, 2H,  $J = 7.2$  Hz);  $^{13}\text{C}$  NMR (100 MHz,  $\text{CDCl}_3$ )  $\delta$  27.4, 30.0, 50.9, 82.9, 128.7, 129.0, 134.1, 137.4, 158.4; MS (FAB)  $m/z$  284 ( $[\text{M}+\text{H}]^+$ , 12), 228 (30), 184 (100) 154 (38), 57 (90); HRMS (FAB) calcd for  $\text{C}_{13}\text{H}_{18}\text{NO}_4\text{S}$  284.0951 ( $[\text{M}+\text{H}]^+$ ), found  $m/z$  284.0955.

### (4*R*,7*S*)-1-[(2'*S*)-(1'*tert*-Butoxycarbonyl)aziridin-2'-yl]carbonyl]-4-methyl-3-phenyl-7-propyl-4,5,6,7-tetrahydroindazole (**2l**).

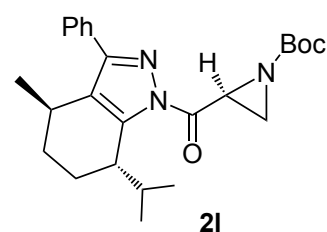

The analytical data for this compound were in excellent agreement with the reported data.<sup>6)</sup> 144.5 mg (66%); Colorless oil;  $R_f = 0.44$  (hexane/EtOAc, 7:3, v/v, silica gel plate);  $^1\text{H}$  NMR (400 MHz,  $\text{CDCl}_3$ )  $\delta$  0.89-0.97 (m, 9H), 1.46 (s, 10H overlap with 1H), 1.76-1.85 (m, 2H), 2.04-2.16 (m, 2H), 2.56 (dd, 1H,  $J = 1.6, 5.7$  Hz), 2.68 (dd, 1H,  $J = 1.6, 3.2$  Hz), 3.20-3.26 (m, 1H), 3.36-3.39 (m, 1H), 4.67 (dd, 1H,  $J = 3.2, 5.7$  Hz), 7.39-7.47 (m, 3H), 7.81-7.84 (m, 2H);  $^{13}\text{C}$  NMR (100 MHz,  $\text{CDCl}_3$ )  $\delta$  19.5, 19.7, 20.6, 20.9, 25.6, 26.8, 27.8, 31.4, 32.3, 35.0, 37.7, 81.8, 125.2, 127.5, 128.5, 128.8, 132.7, 146.2, 153.5, 160.0, 167.0.

## 8. References

- (1) H. Zhang, X. Lin, S. Chin and M. W. Grinstaff, *J. Am. Chem. Soc.*, 2015, **137**, 12660.
- (2) S. Chanthamath, S. Takaki, K. Shibatomi and S. Iwasa, *Angew. Chem. Int. Ed.*, 2013, **52**, 5818.
- (3) M. P. Sibi and K. Itoh, *J. Am. Chem. Soc.* 2007, **129**, 8064.
- (4) A. Sakakura, R. Kondo, Y. Matsumura, M. Akakura and K. Ishihara, *J. Am. Chem. Soc.*, 2009, **131**, 17762.
- (5) A. S. Brar and P. K. Singh, *Indian J. Chem.*, 2006, **45A**, 581.
- (6) Y. Murakami, Y. Takeda and S. Minakata, *J. Org. Chem.*, 2011, **76**, 6277.
- (7) E. J. Corey, F. Xu and M. C. Noe, *J. Am. Chem. Soc.*, 1997, **119**, 12414.
- (8) A. L. Braga, P. H. Schneider, M. W. Paixão, A. M. Deobald and D. P. Bottega, *J. Org. Chem.*, 2006, **71**, 4305.
- (9) Y.-C. Wu and J. Zhu, *Org. Lett.*, 2009, **11**, 5558.



## 9. NMR & HPLC data

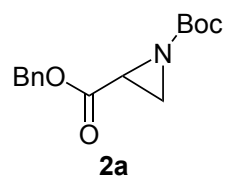

$^1\text{H}$  NMR (400 MHz,  $\text{CDCl}_3$ )

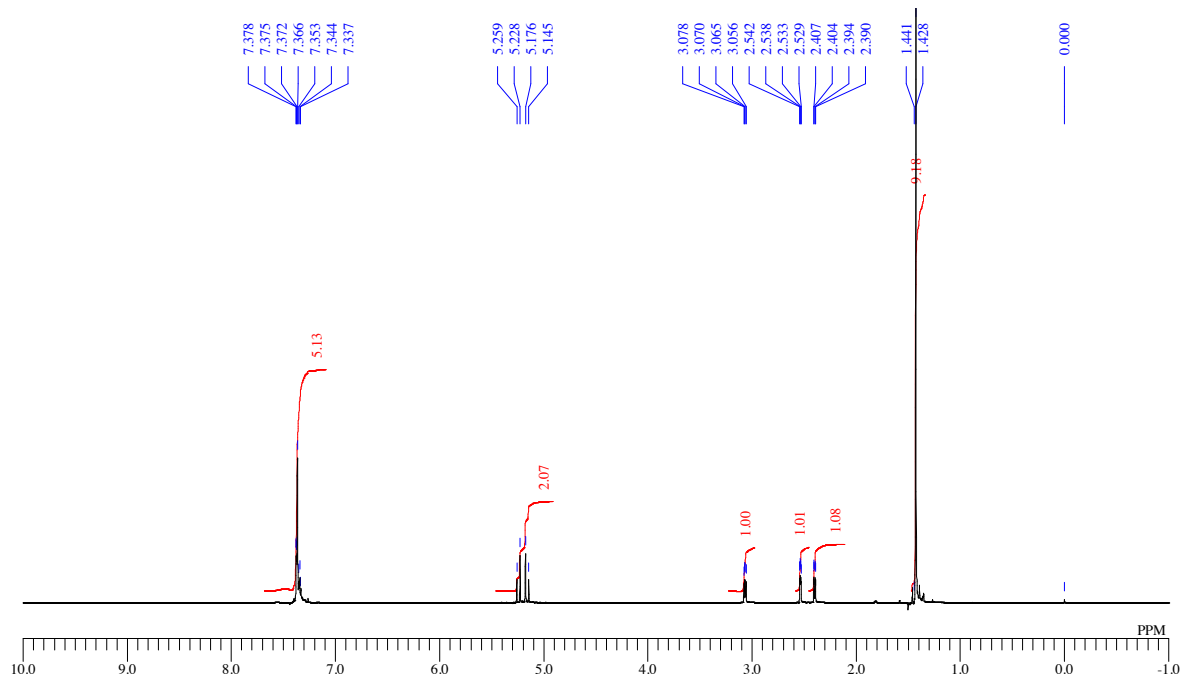

$^{13}\text{C}$  NMR (100 MHz,  $\text{CDCl}_3$ )

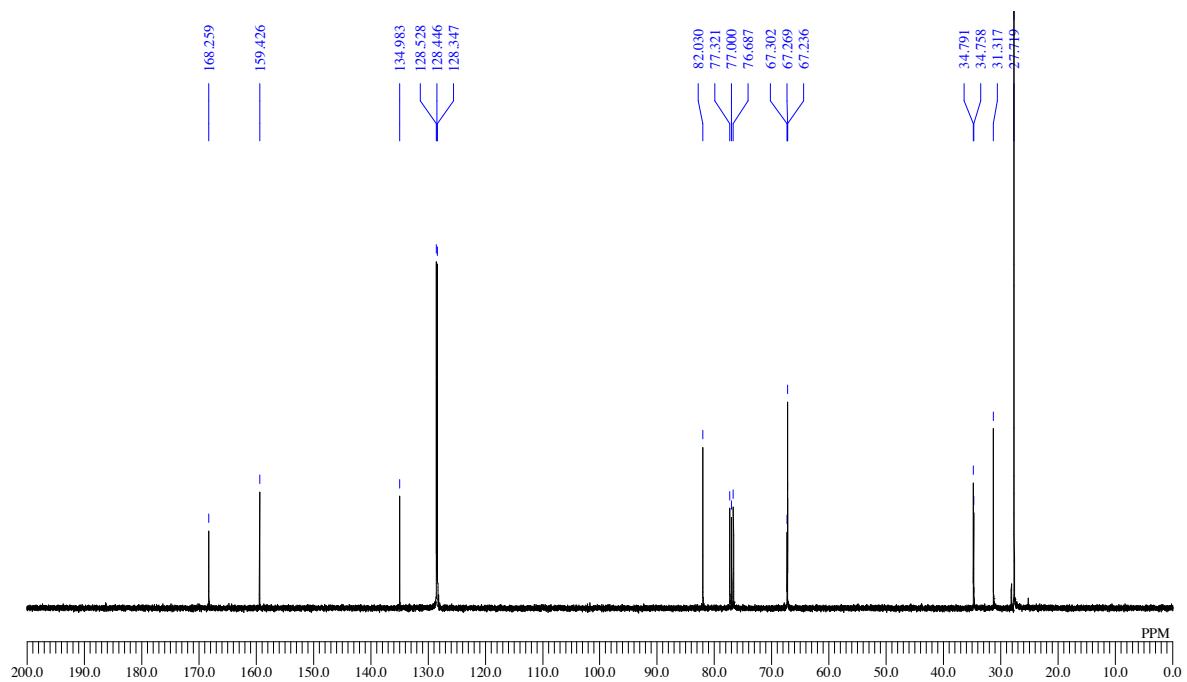

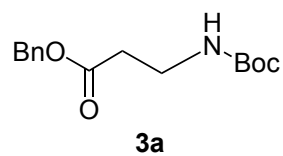

<sup>1</sup>H NMR (400 MHz, CDCl<sub>3</sub>)

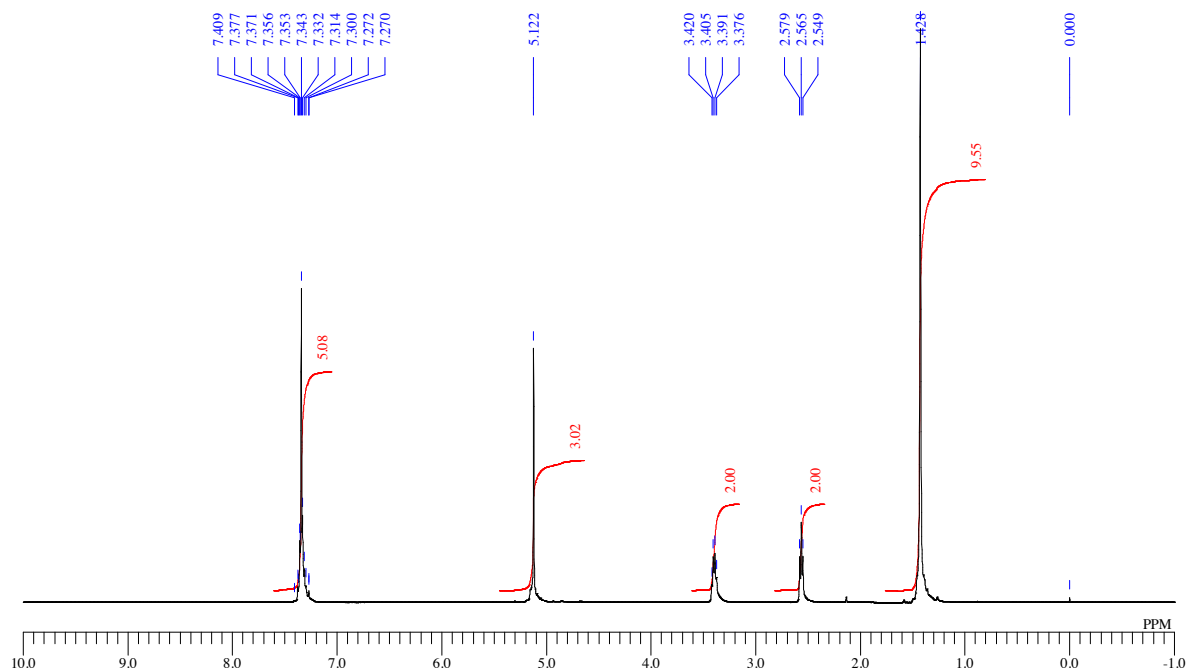

<sup>13</sup>C NMR (100 MHz, CDCl<sub>3</sub>)

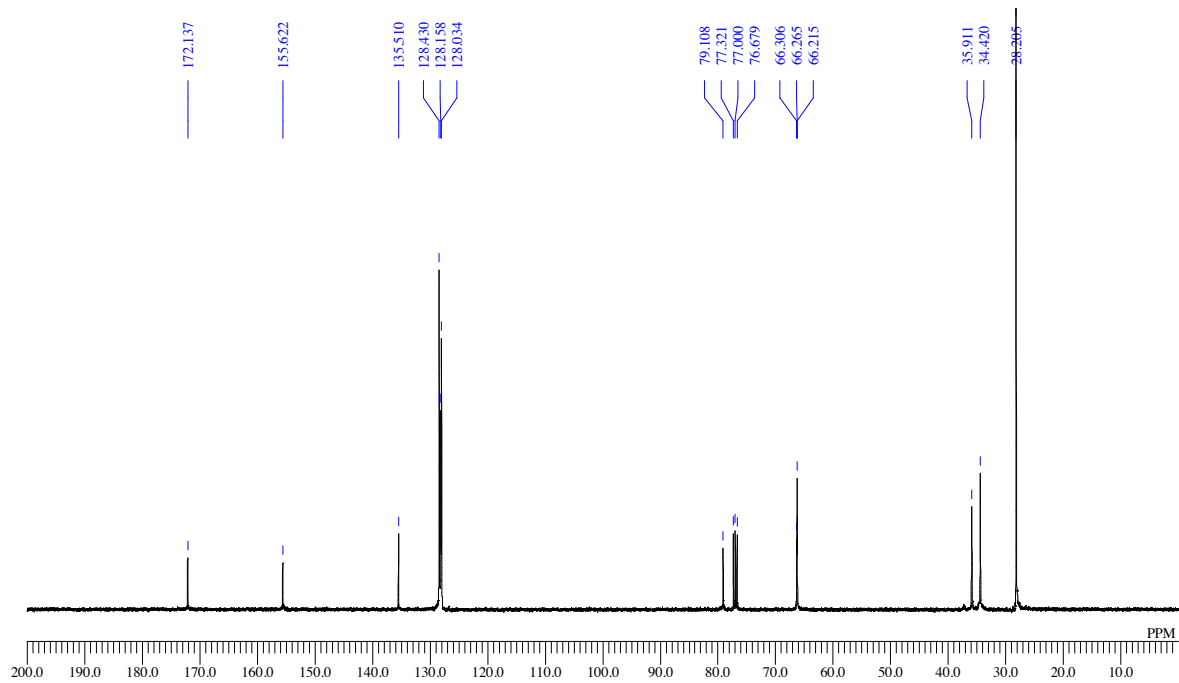

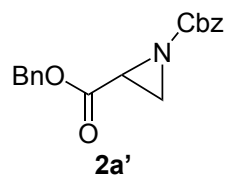

<sup>1</sup>H NMR (400 MHz, CDCl<sub>3</sub>)

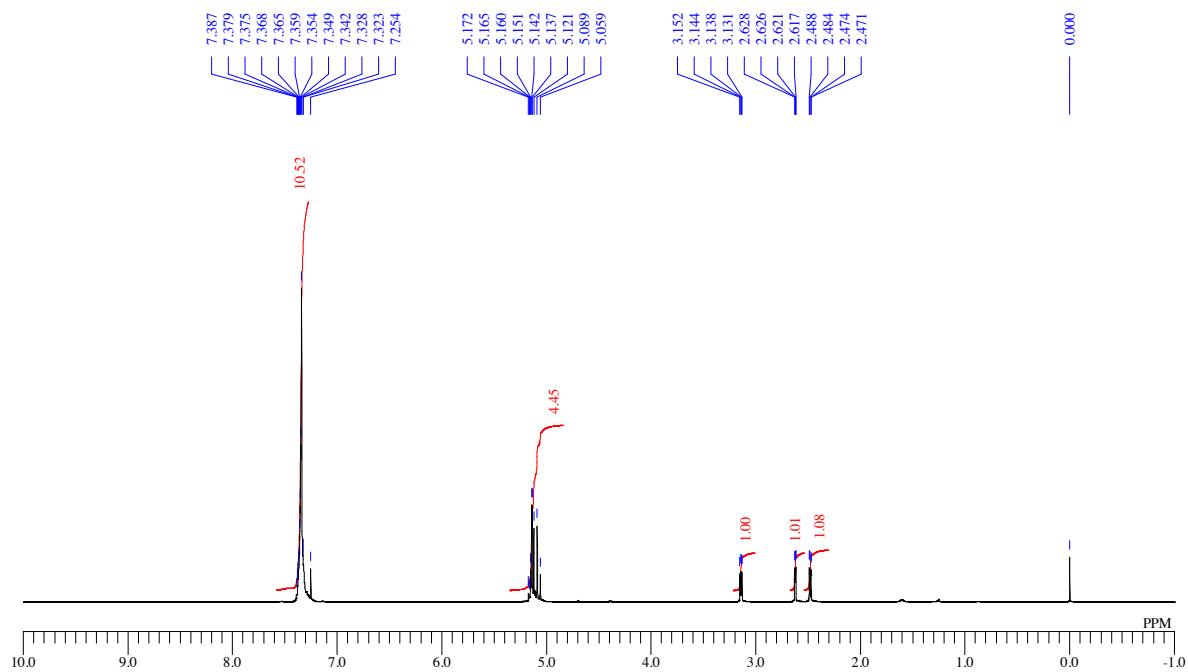

<sup>13</sup>C NMR (100 MHz, CDCl<sub>3</sub>)

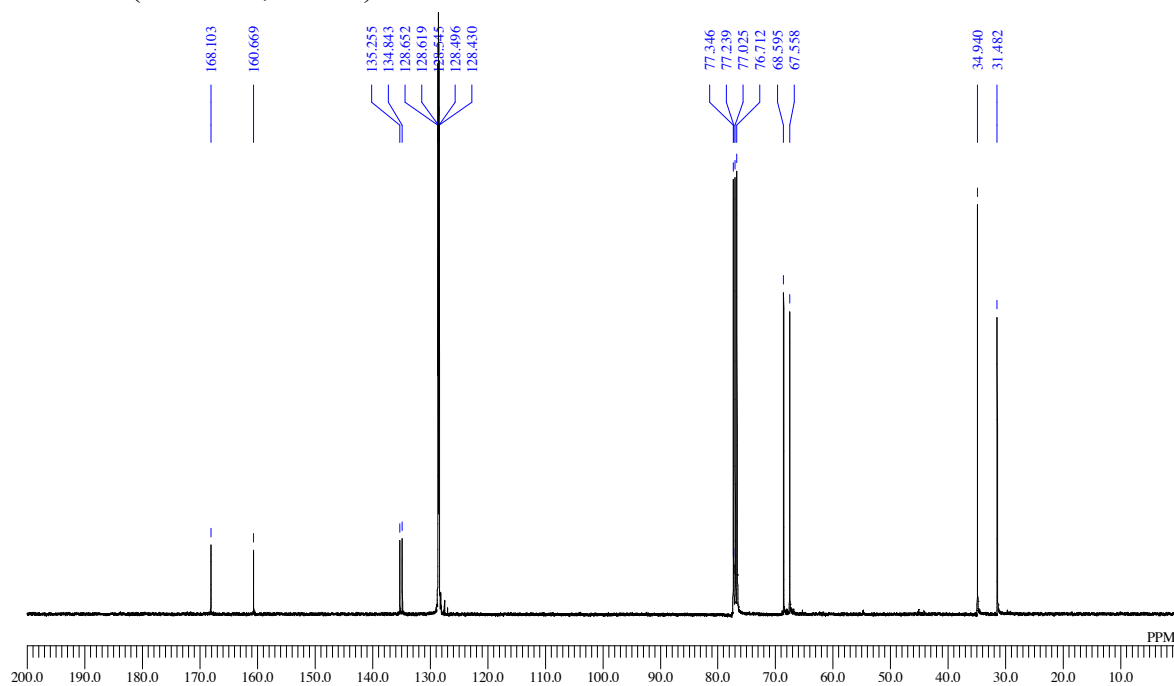

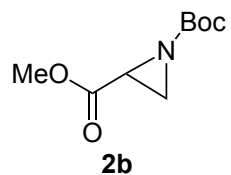

<sup>1</sup>H NMR (400 MHz, CDCl<sub>3</sub>)

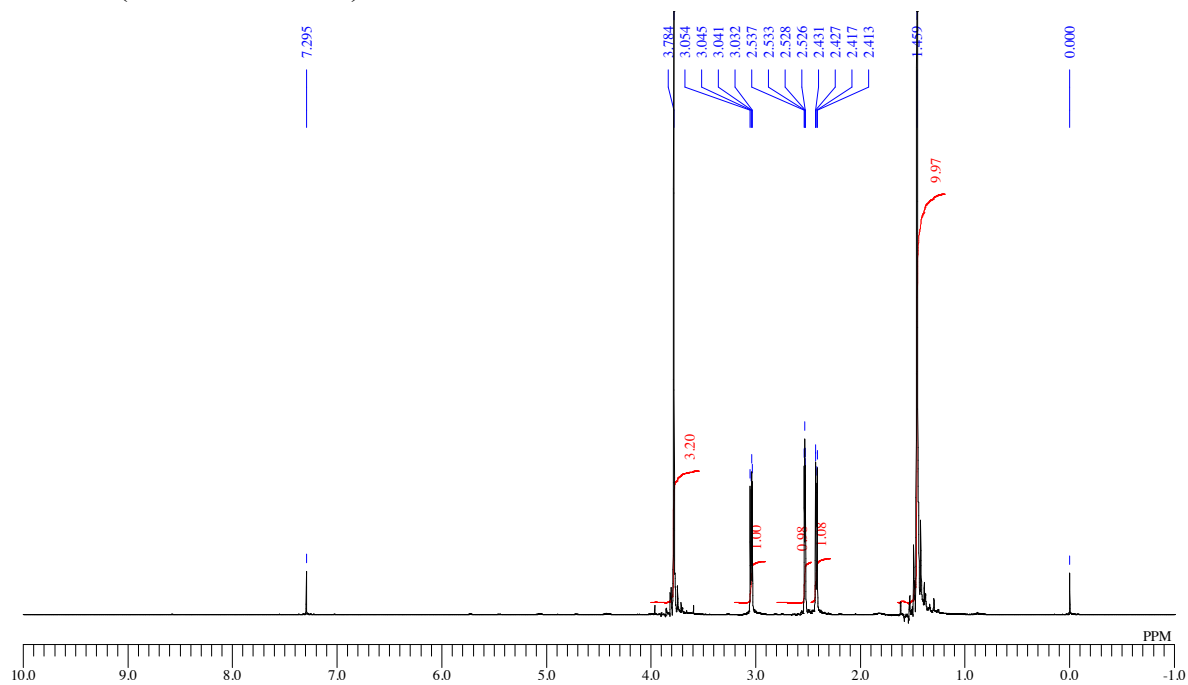

<sup>13</sup>C NMR (100 MHz, CDCl<sub>3</sub>)

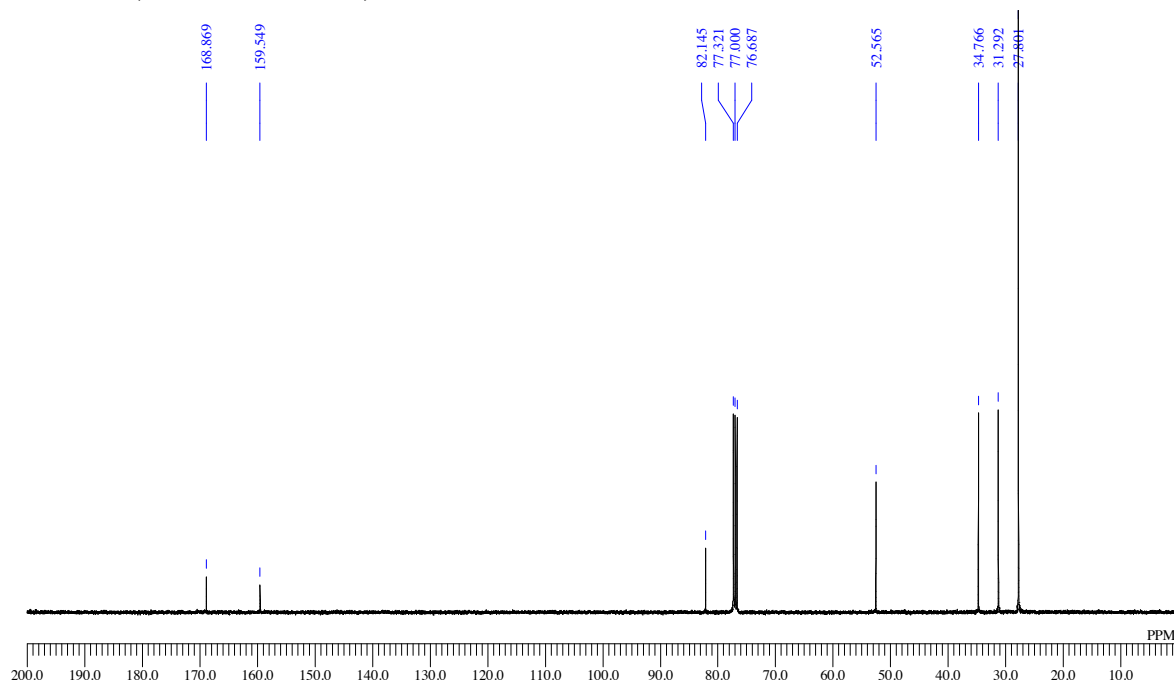

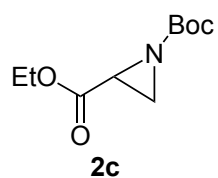

$^1\text{H}$  NMR (400 MHz,  $\text{CDCl}_3$ )

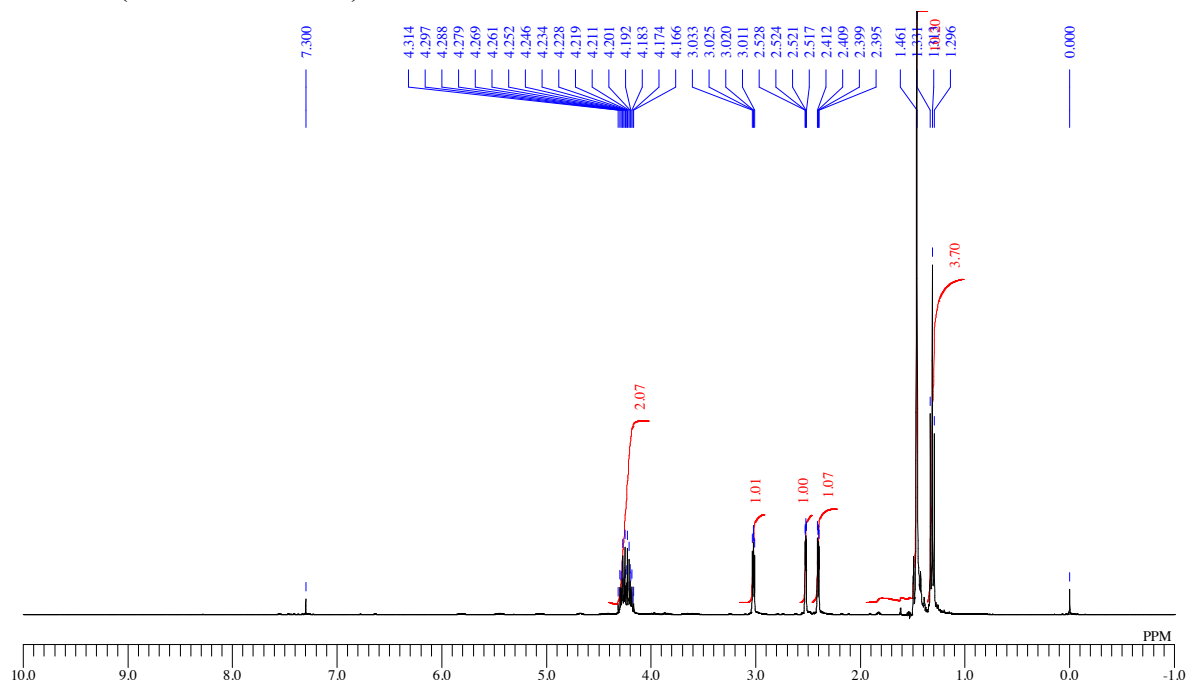

$^{13}\text{C}$  NMR (100 MHz,  $\text{CDCl}_3$ )

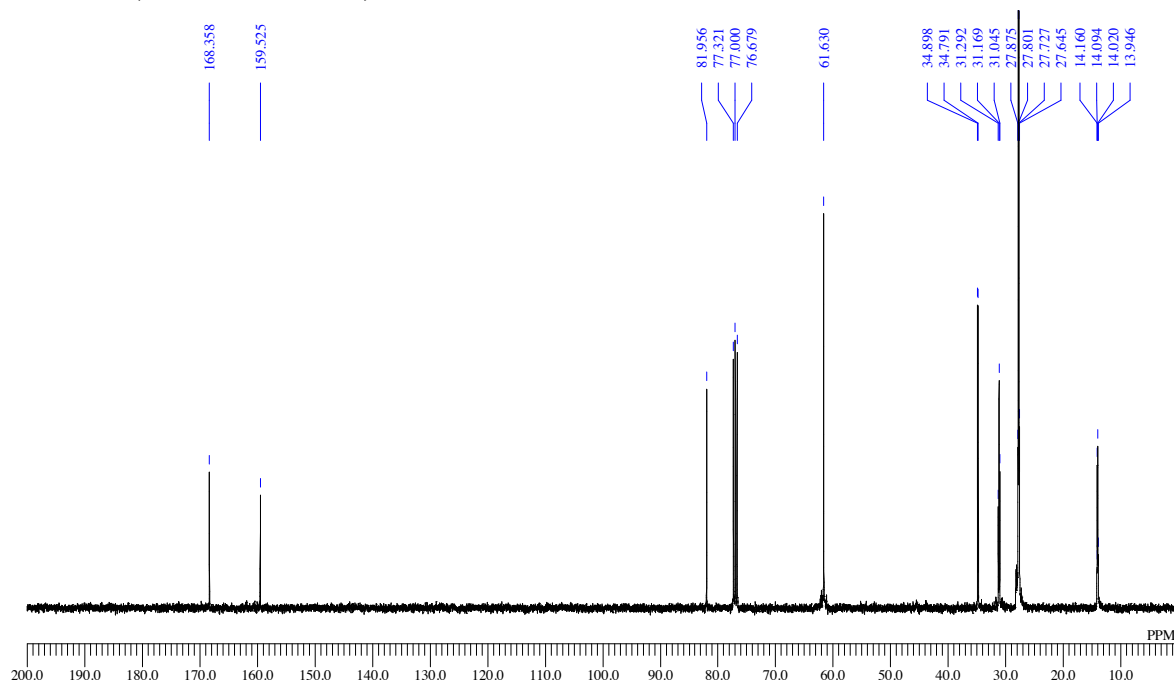

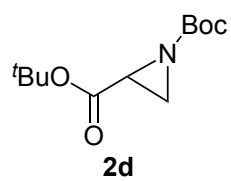

$^1\text{H}$  NMR (400 MHz,  $\text{CDCl}_3$ )

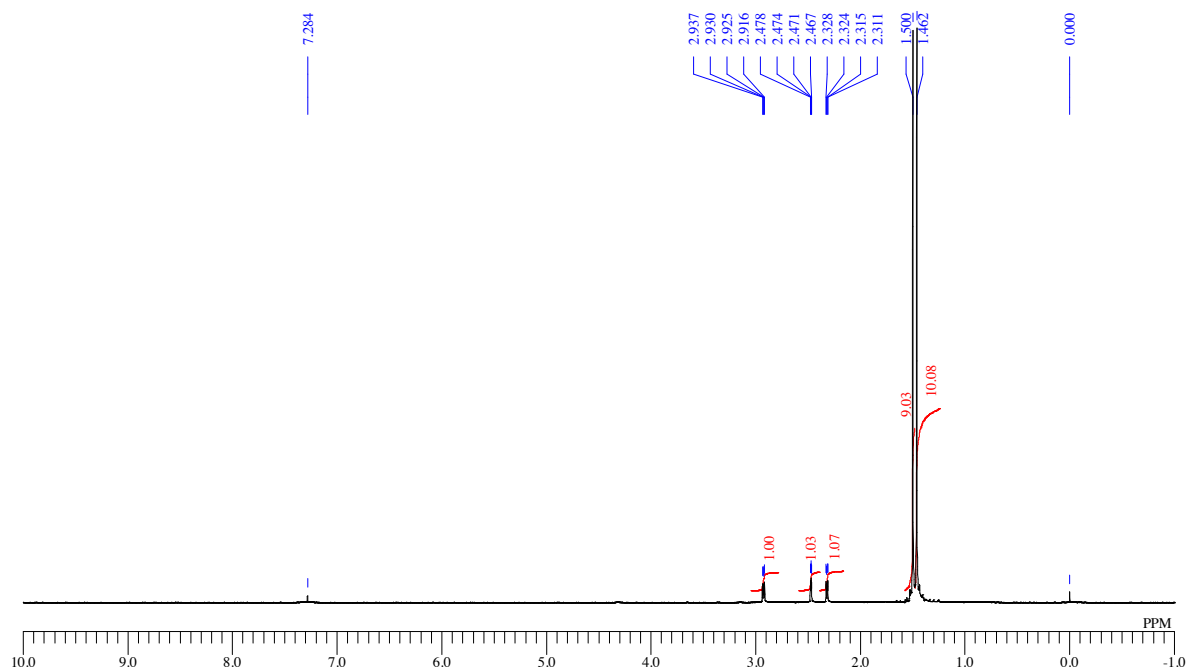

$^{13}\text{C}$  NMR (100 MHz,  $\text{CDCl}_3$ )

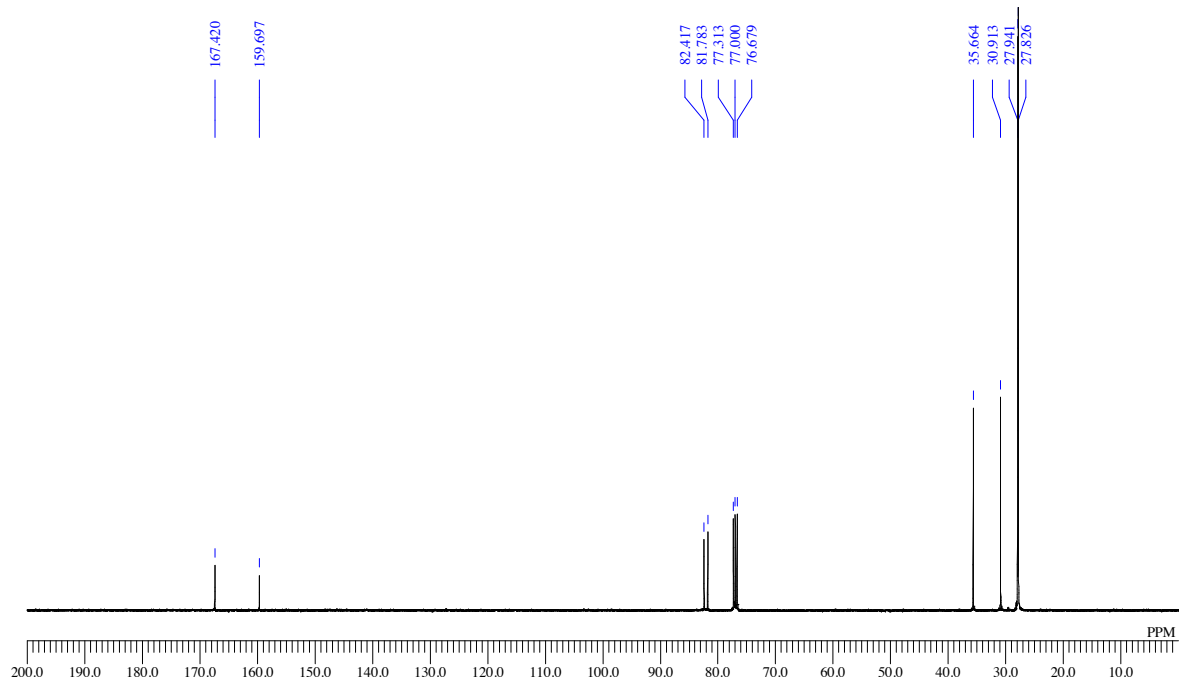

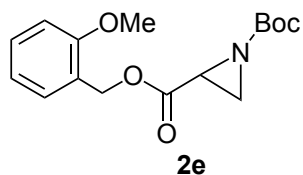

$^1\text{H NMR}$  (400 MHz,  $\text{CDCl}_3$ )

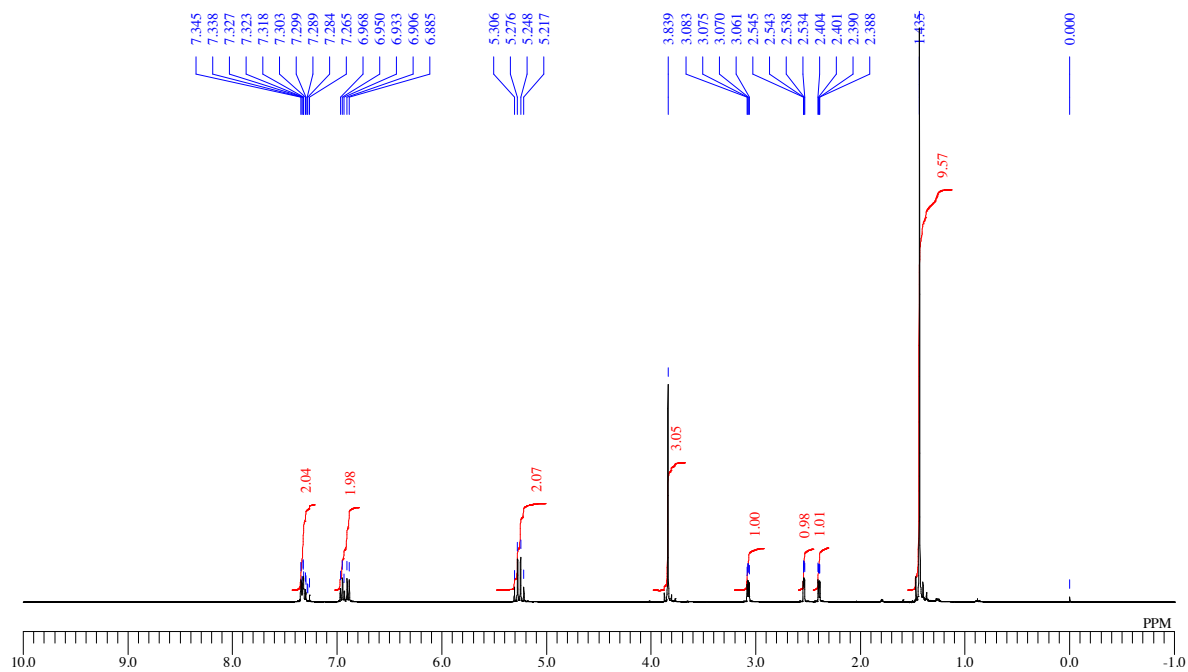

$^{13}\text{C NMR}$  (100 MHz,  $\text{CDCl}_3$ )

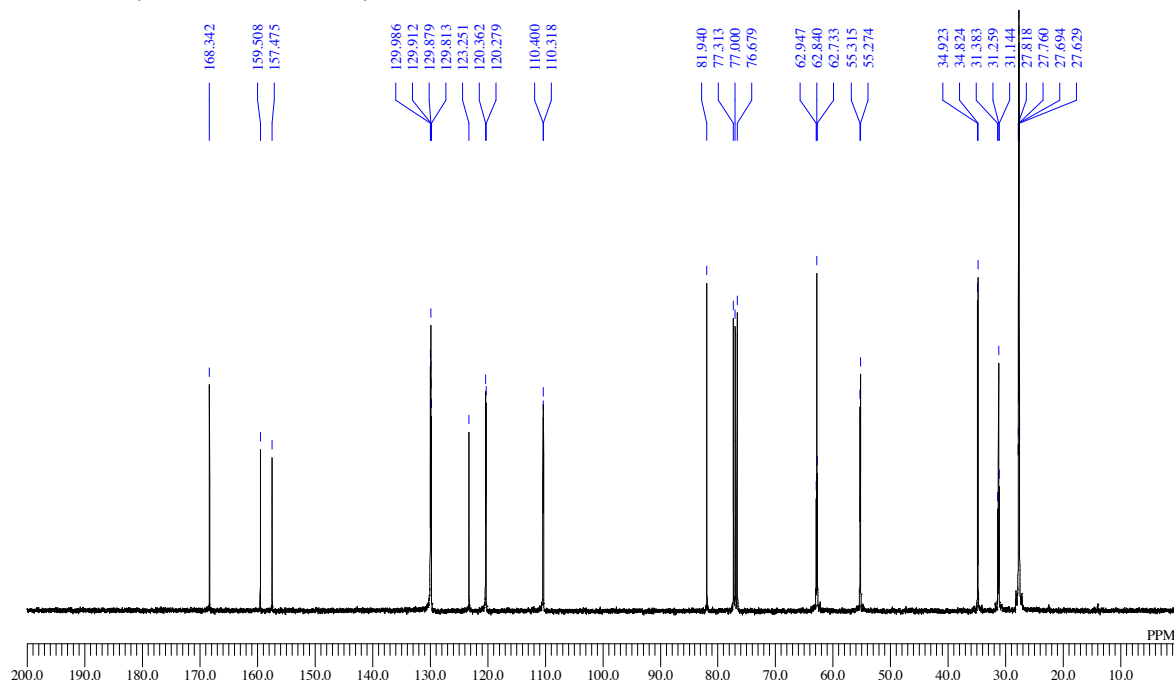

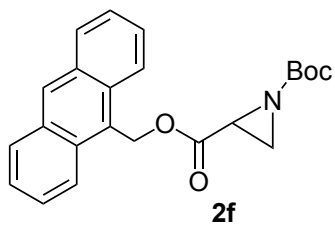

$^1\text{H}$  NMR (400 MHz,  $\text{CDCl}_3$ )

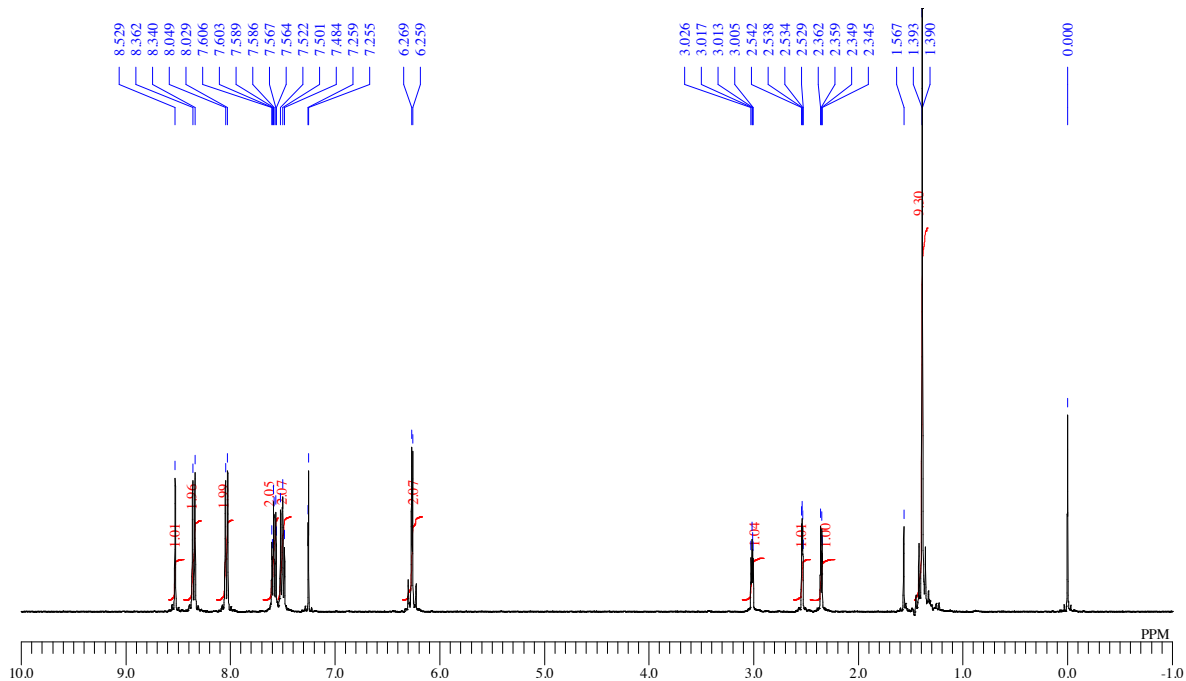

$^{13}\text{C}$  NMR (100 MHz,  $\text{CDCl}_3$ )

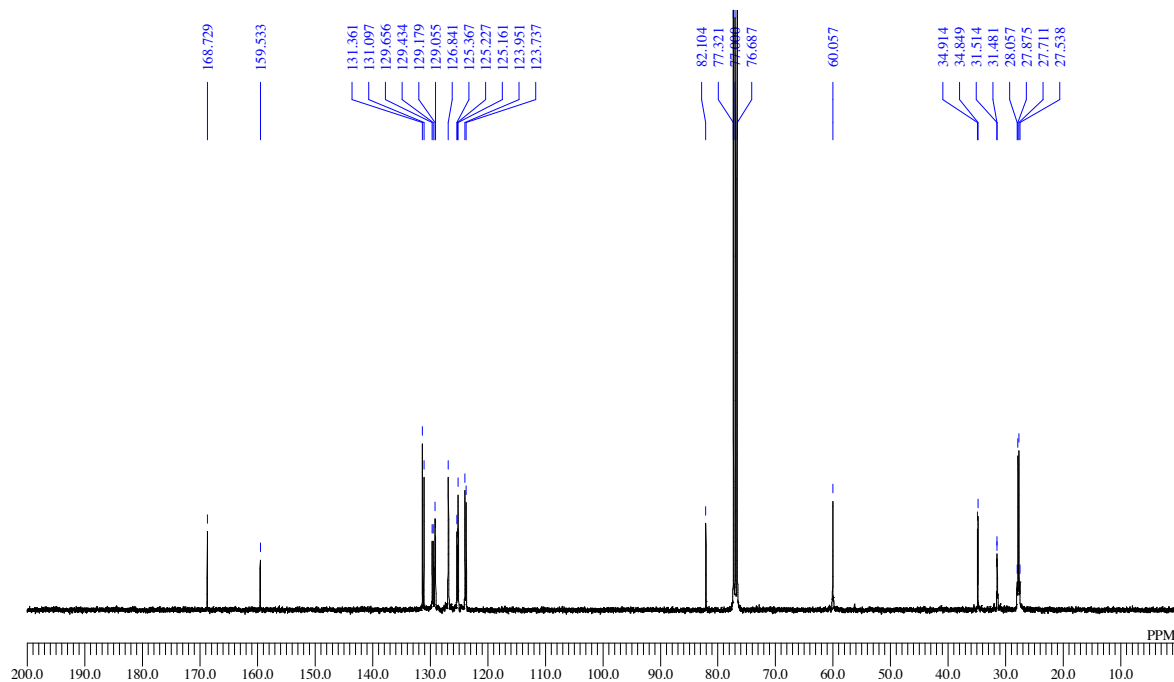



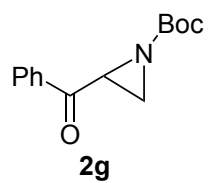

$^1\text{H}$  NMR (400 MHz,  $\text{CDCl}_3$ )

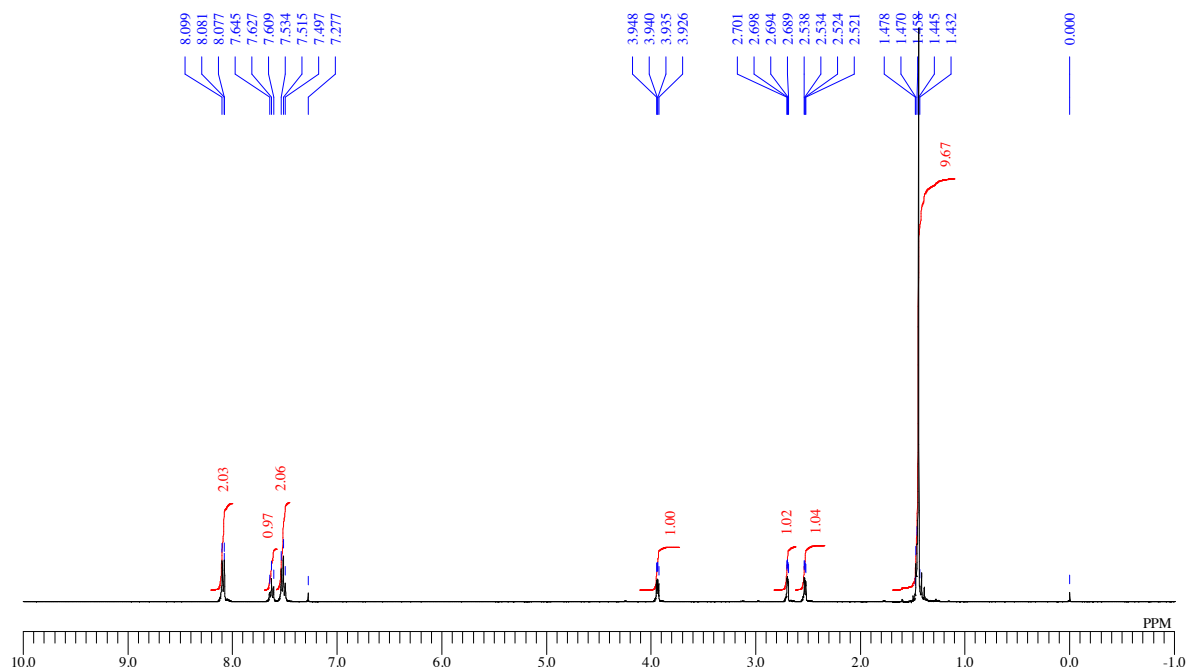

$^{13}\text{C}$  NMR (100 MHz,  $\text{CDCl}_3$ )

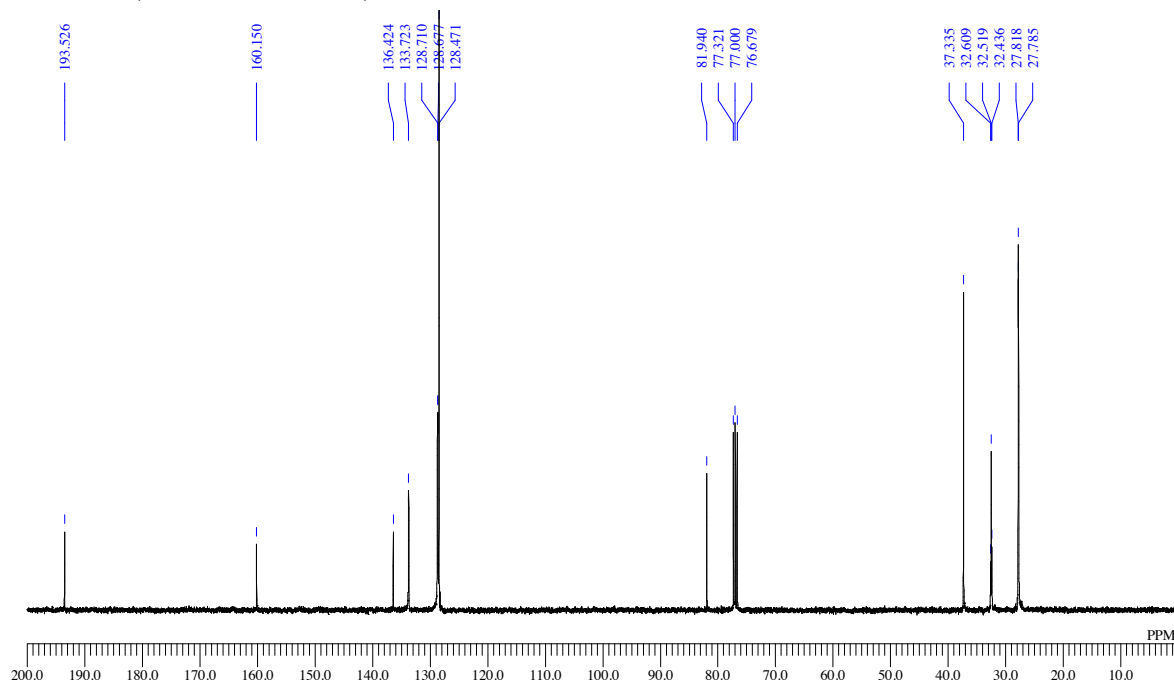

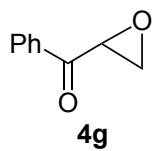

<sup>1</sup>H NMR (400 MHz, CDCl<sub>3</sub>)

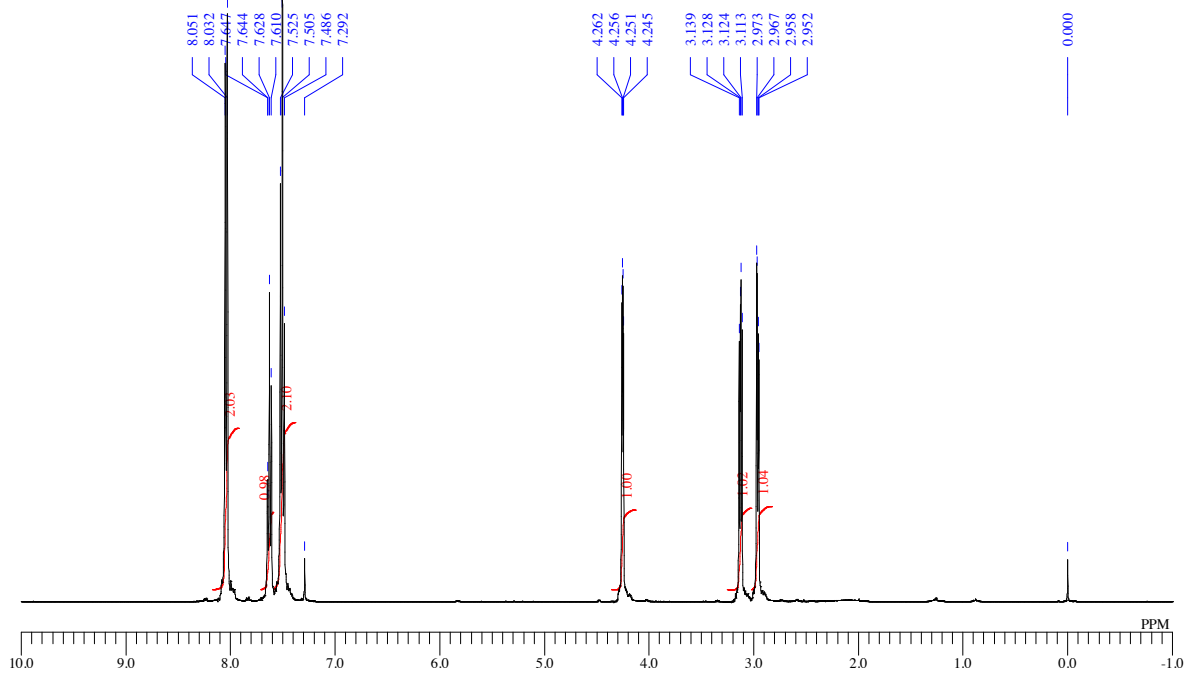

<sup>13</sup>C NMR (100 MHz, CDCl<sub>3</sub>)

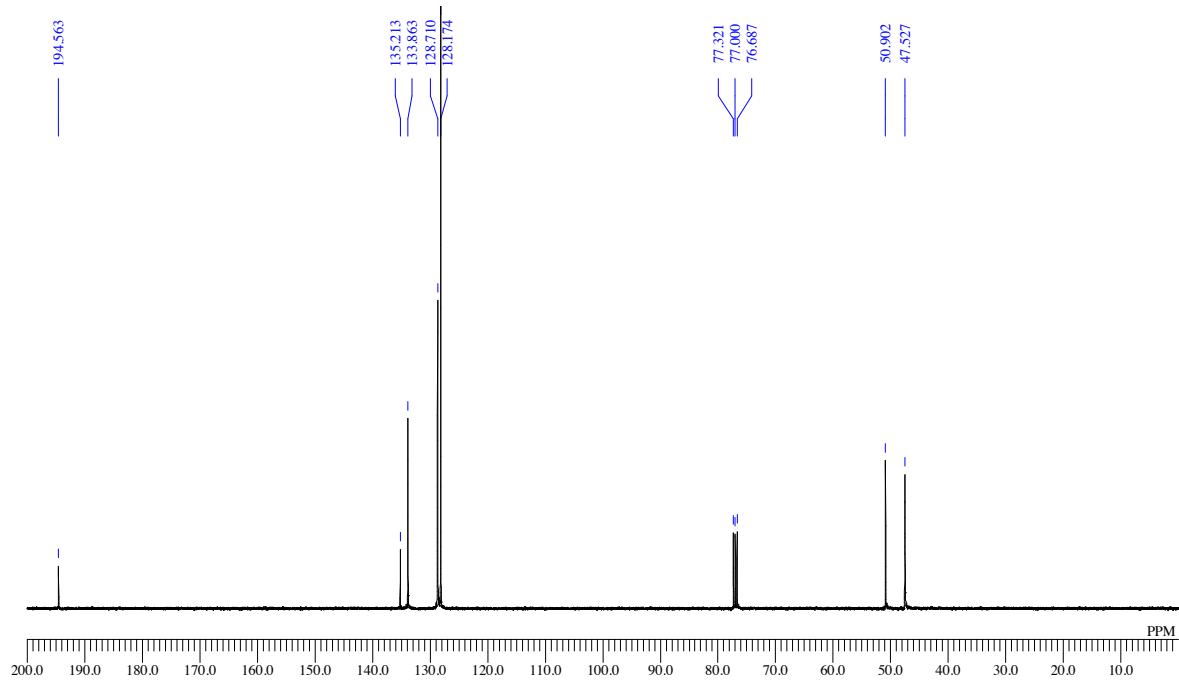

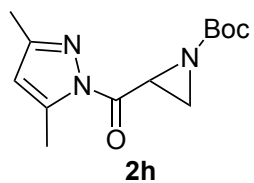

$^1\text{H NMR}$  (400 MHz,  $\text{CDCl}_3$ )

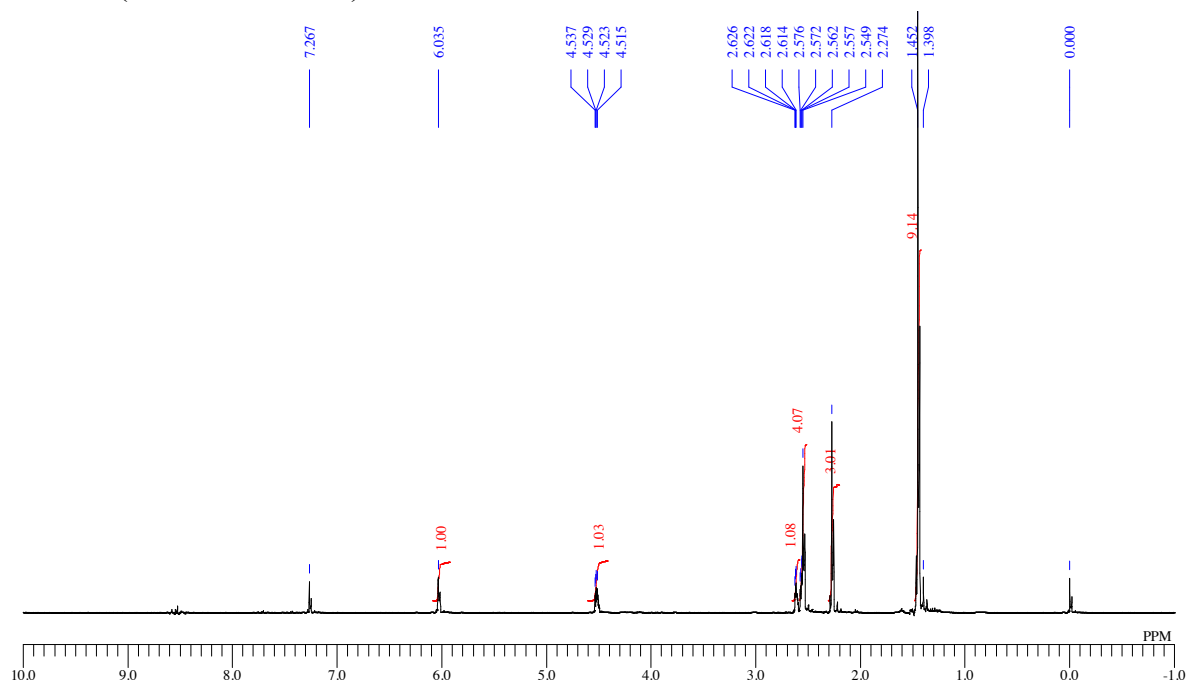

$^{13}\text{C NMR}$  (100 MHz,  $\text{CDCl}_3$ )

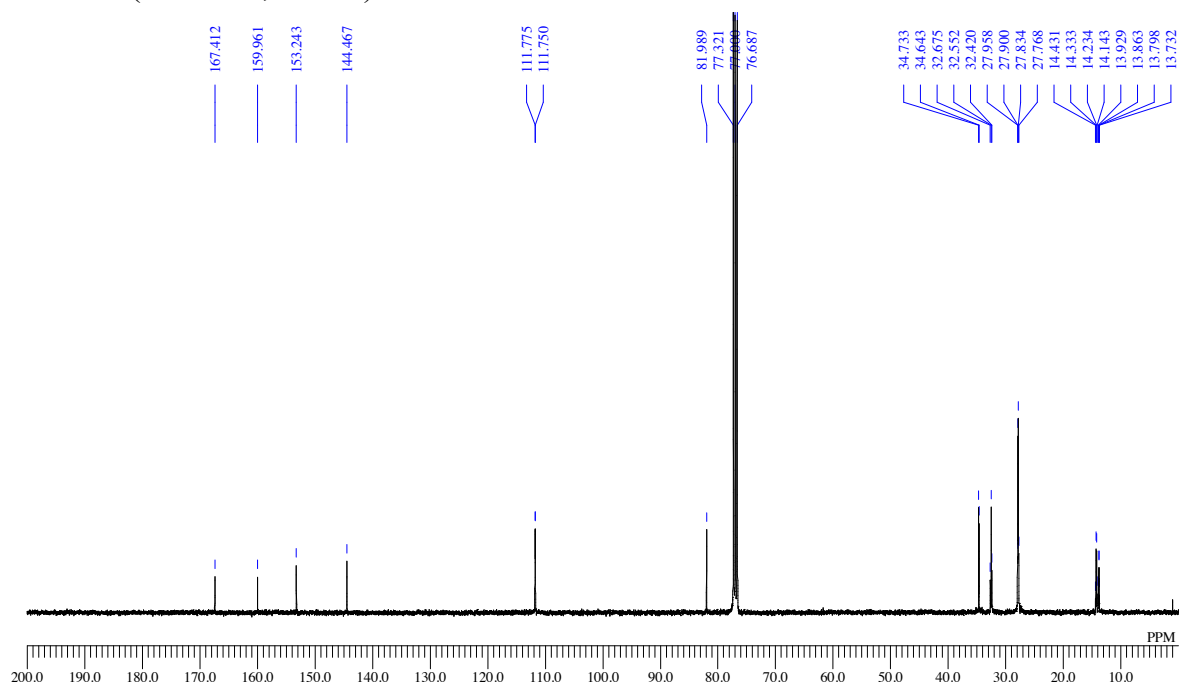

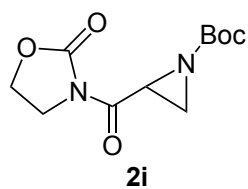

$^1\text{H NMR}$  (400 MHz,  $\text{CDCl}_3$ )

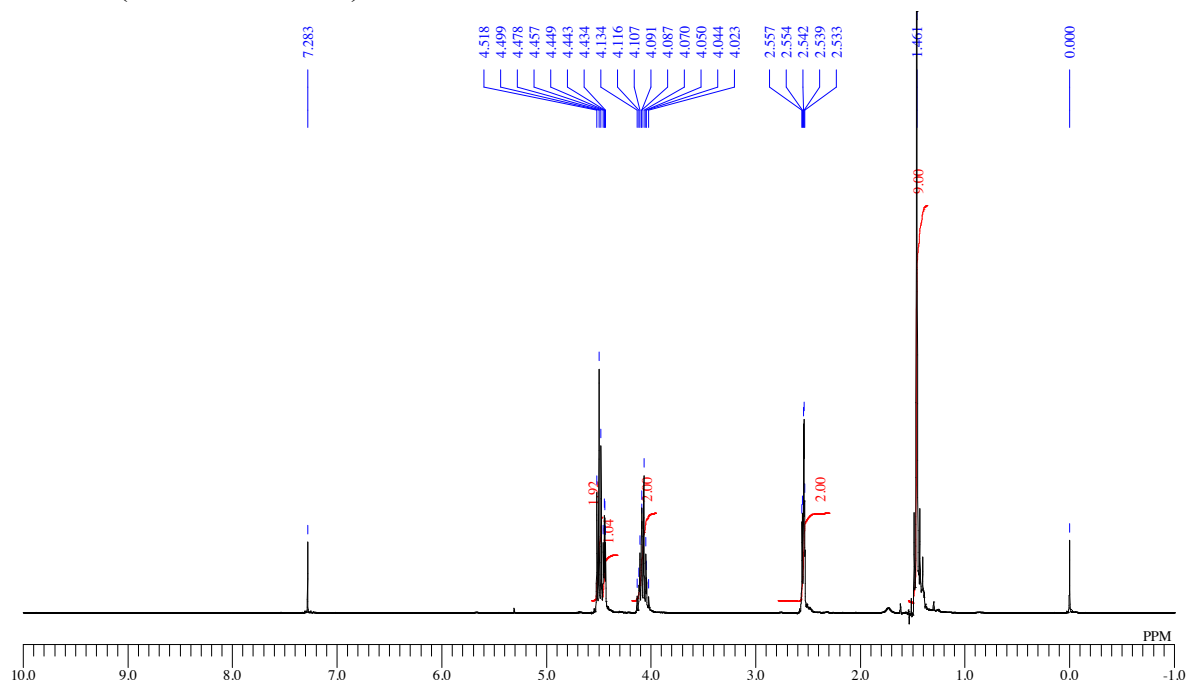

$^{13}\text{C NMR}$  (100 MHz,  $\text{CDCl}_3$ )

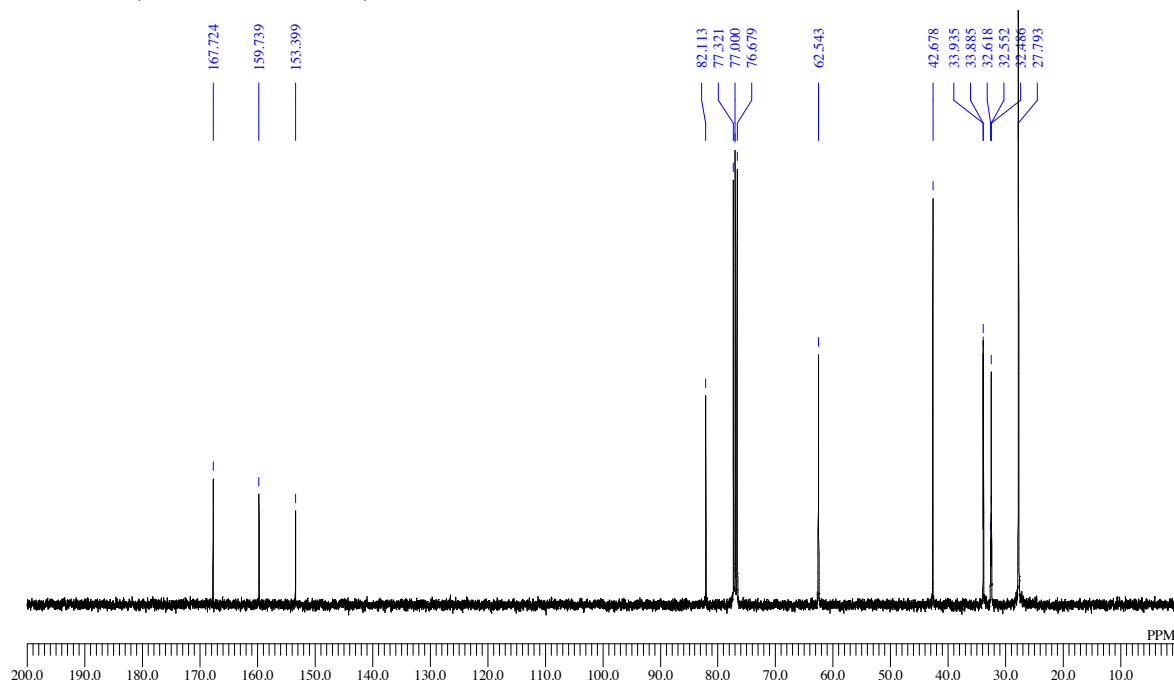

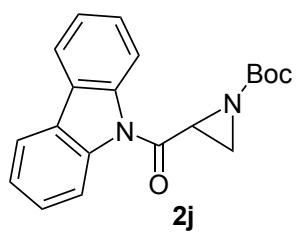

$^1\text{H NMR}$  (400 MHz,  $\text{CDCl}_3$ )

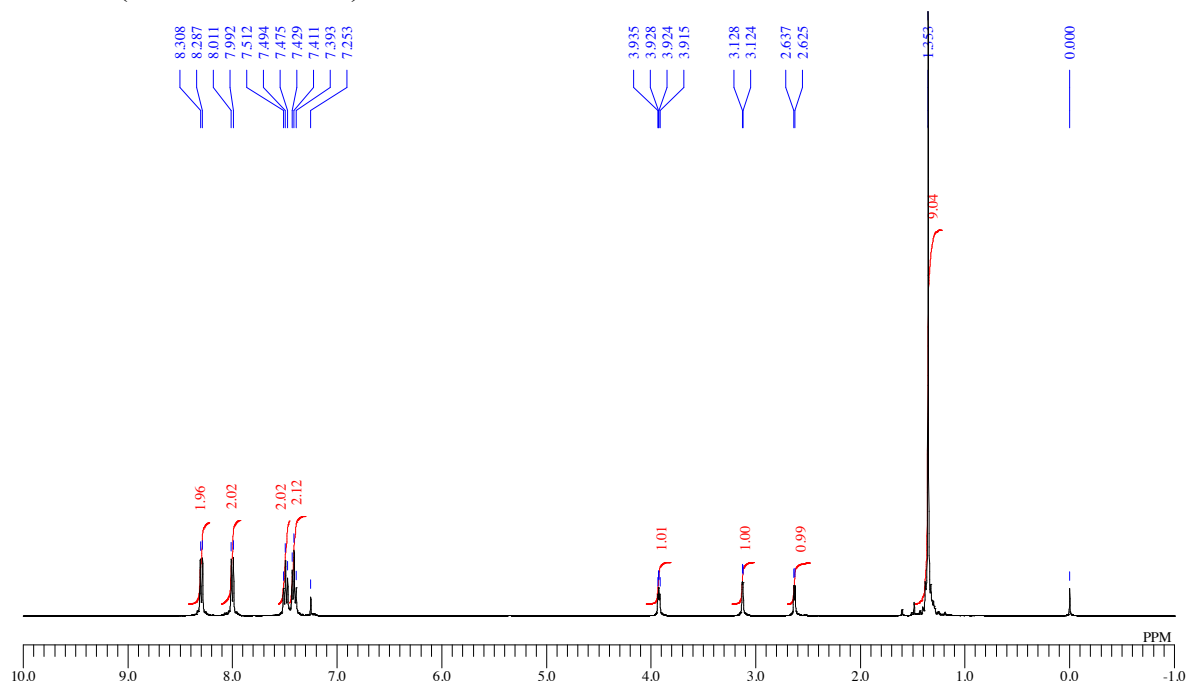

$^{13}\text{C NMR}$  (100 MHz,  $\text{CDCl}_3$ )

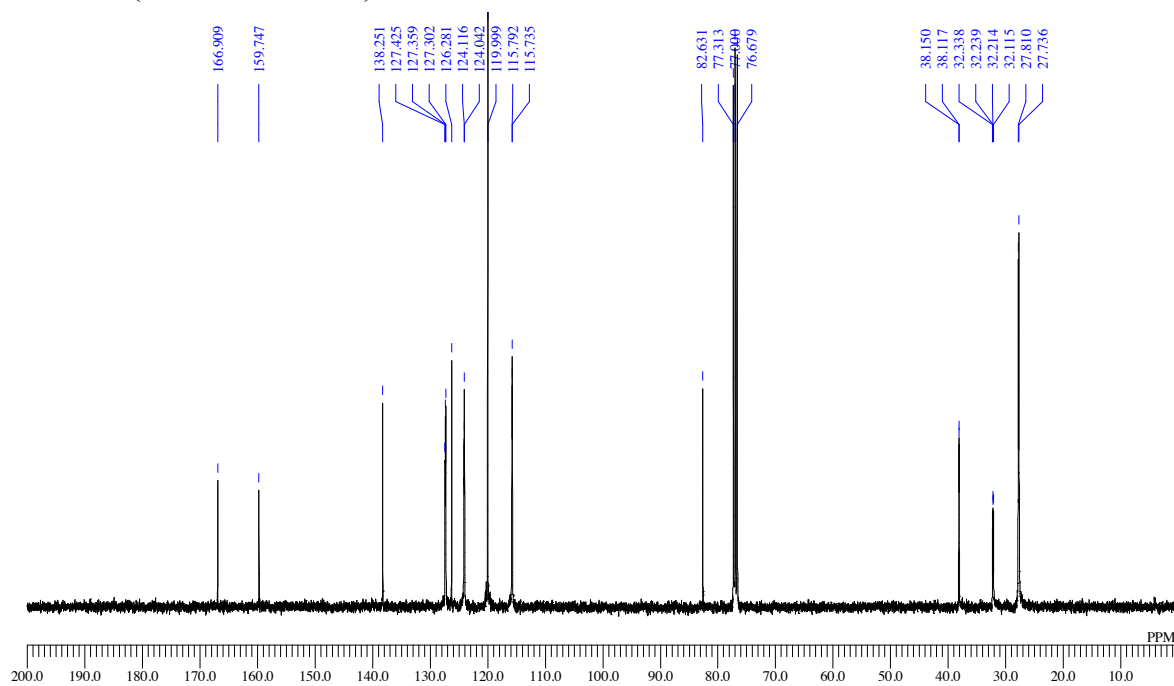

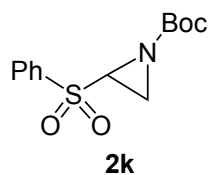

$^1\text{H}$  NMR (400 MHz,  $\text{CDCl}_3$ )

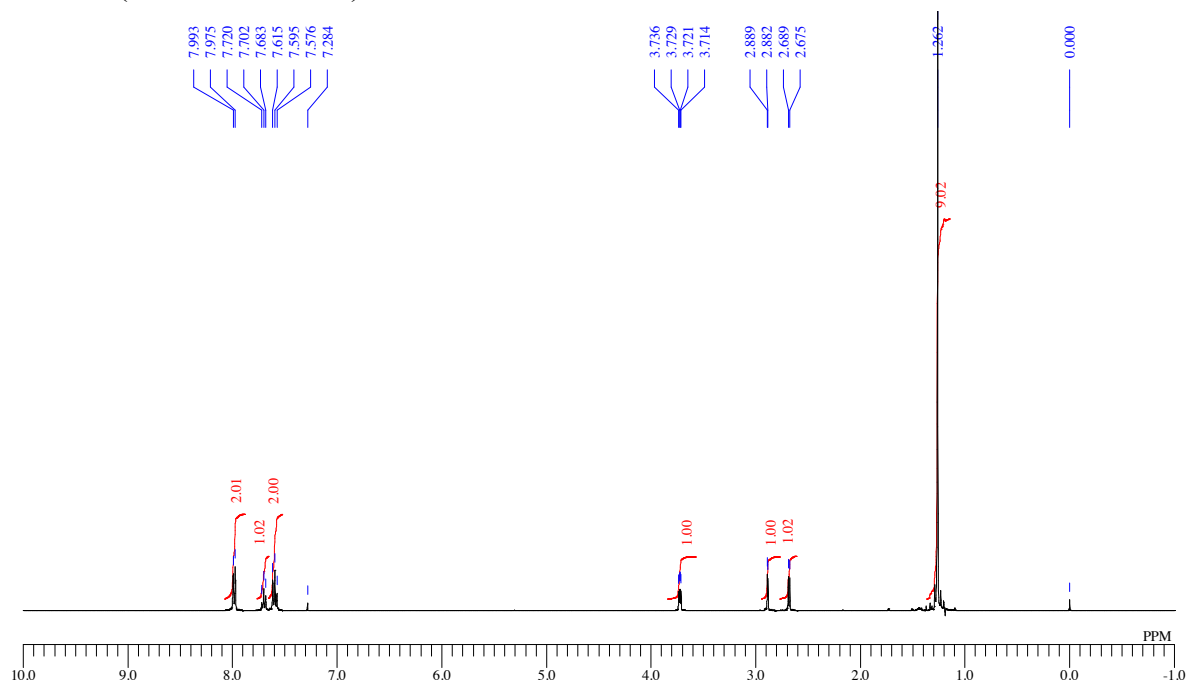

$^{13}\text{C}$  NMR (100 MHz,  $\text{CDCl}_3$ )

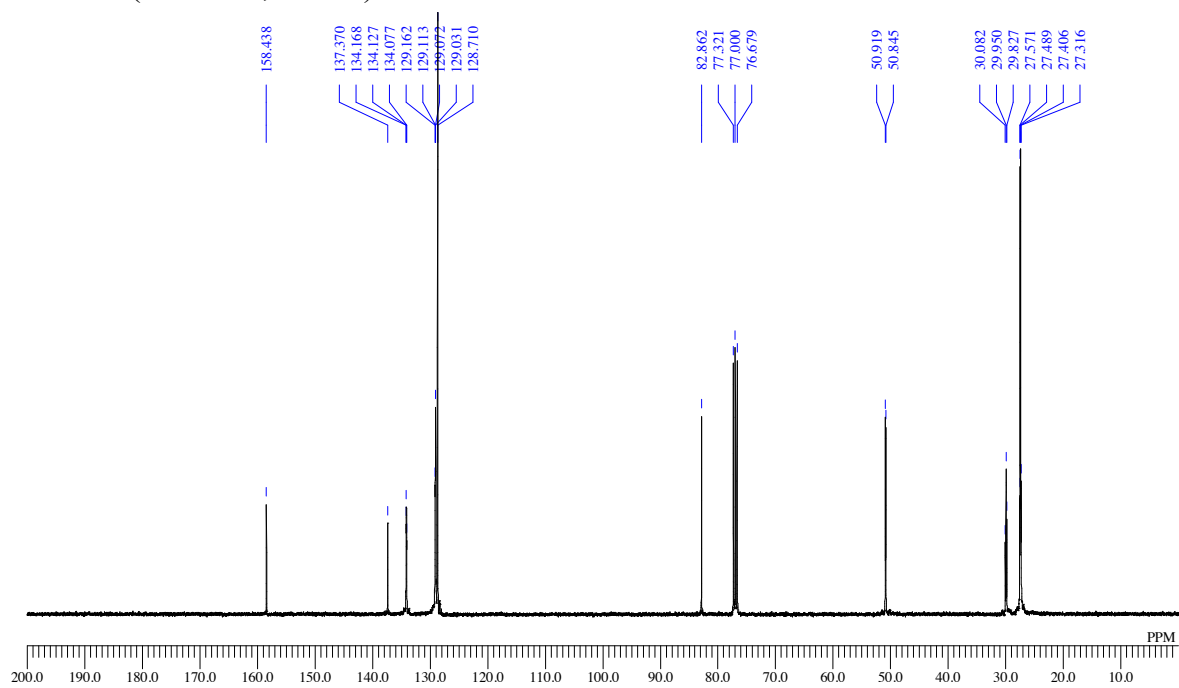

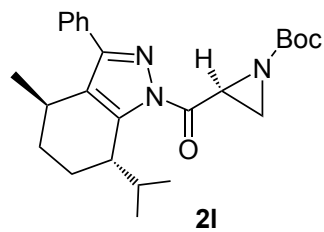

$^1\text{H}$  NMR (400 MHz,  $\text{CDCl}_3$ )

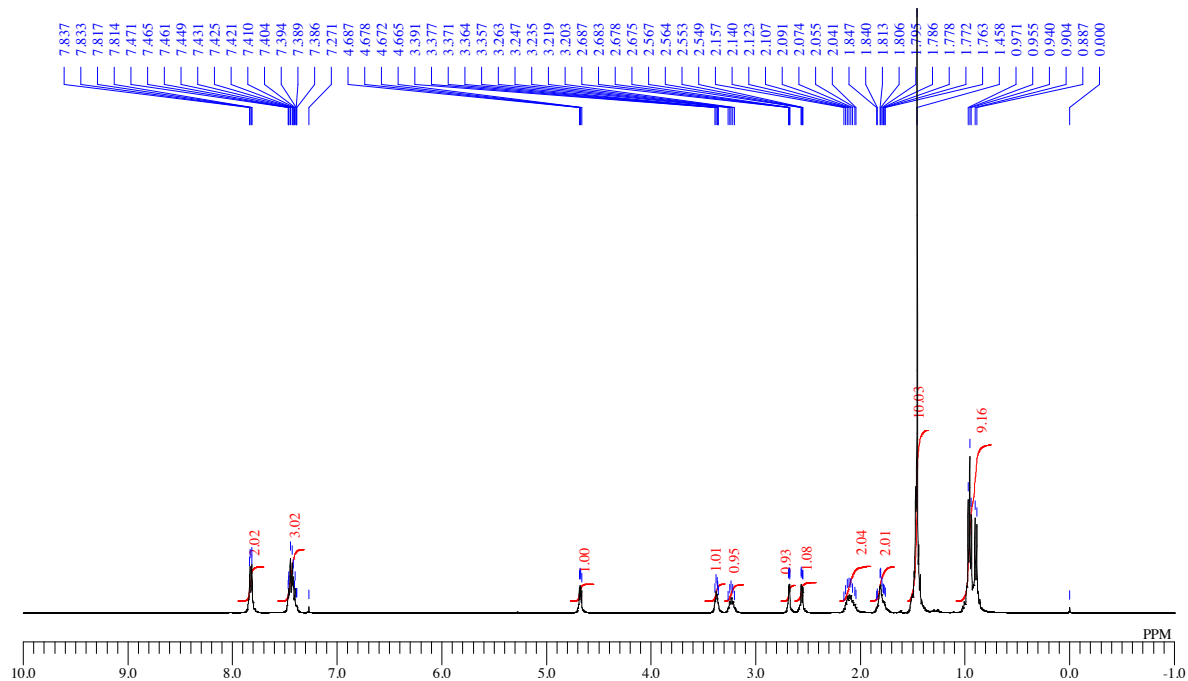

$^{13}\text{C}$  NMR (100 MHz,  $\text{CDCl}_3$ )

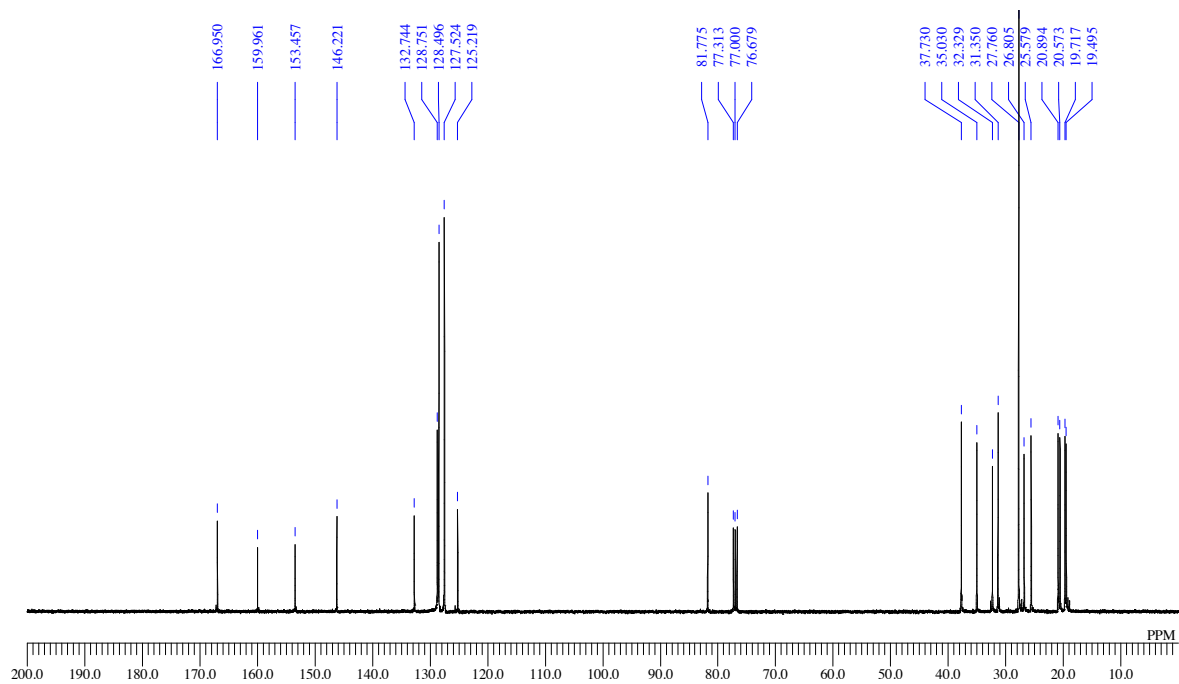

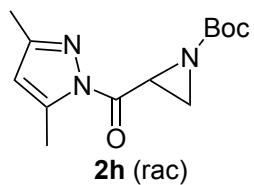

<chromatogram>

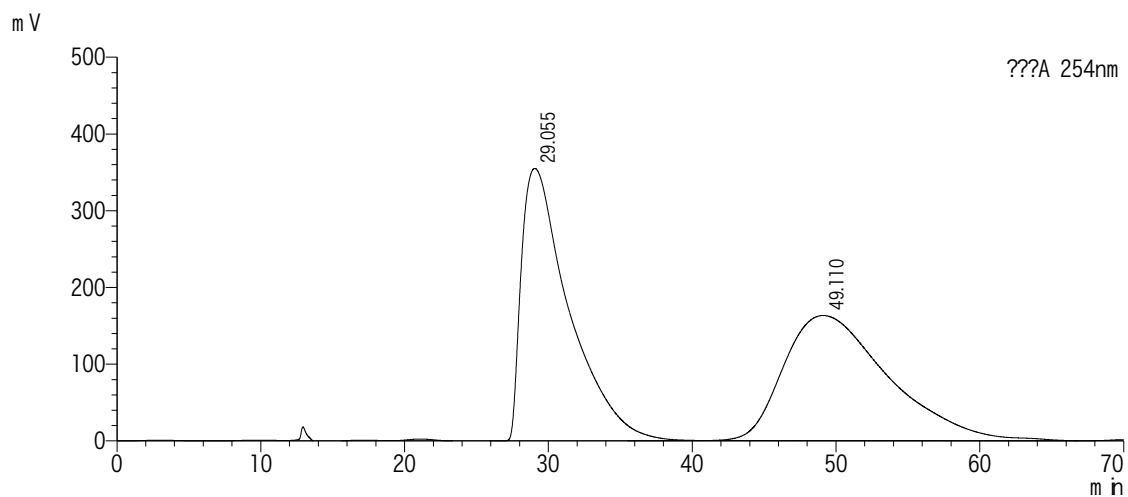

<peak report>

| ??A 254nm |                |          |        |        |
|-----------|----------------|----------|--------|--------|
| peak#     | retention time | area     | height | area%  |
| 1         | 29.055         | 82106538 | 355604 | 49.905 |
| 2         | 49.110         | 82420254 | 162977 | 50.095 |



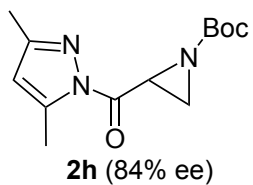

<chrom atogram >

m V

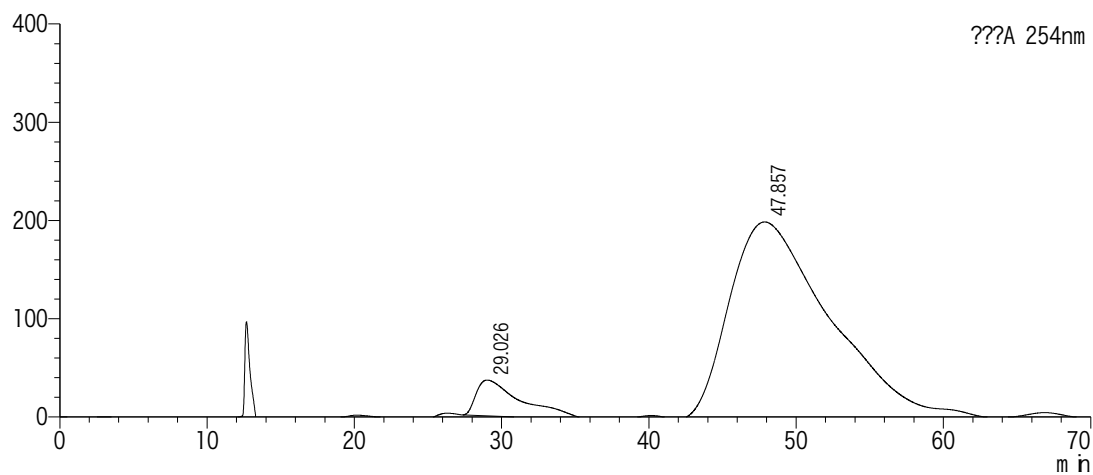

<peak report>

??A 254nm

| peak# | retention time | area     | height | area%  |
|-------|----------------|----------|--------|--------|
| 1     | 29.026         | 8053097  | 36504  | 7.791  |
| 2     | 47.857         | 95310013 | 200361 | 92.209 |

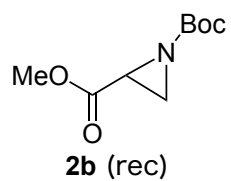

<chromatogram>

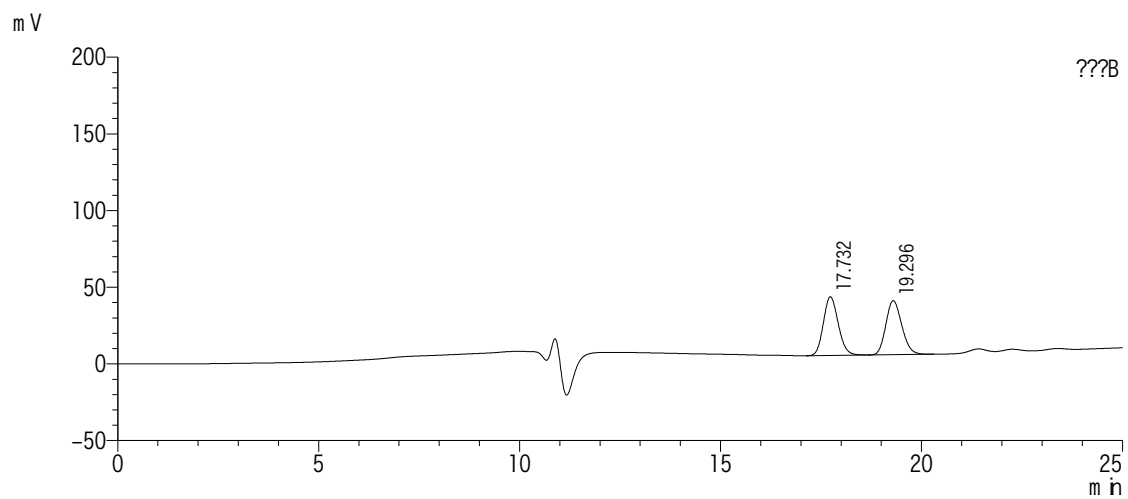

<peak report>

???'B

| peak# | retention time | area   | height | area%  |
|-------|----------------|--------|--------|--------|
| 1     | 17.732         | 987115 | 38304  | 50.302 |
| 2     | 19.296         | 975268 | 35280  | 49.698 |

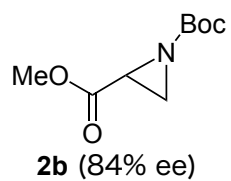

<chromatogram>

mV

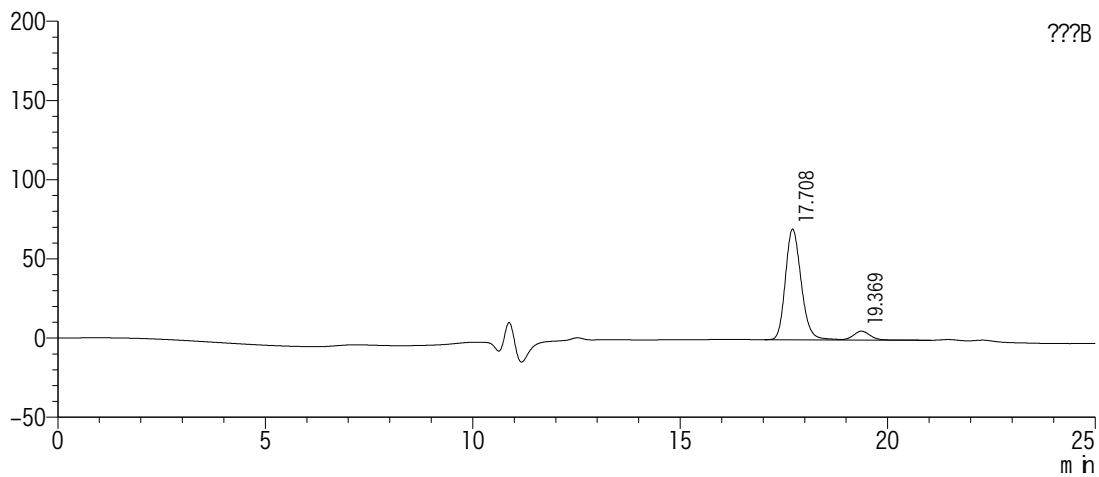

<peak report>

| ???'B | peak# | retention time | area    | height | area%  |
|-------|-------|----------------|---------|--------|--------|
|       | 1     | 17.708         | 1845669 | 69949  | 92.132 |
|       | 2     | 19.369         | 157623  | 5575   | 7.868  |

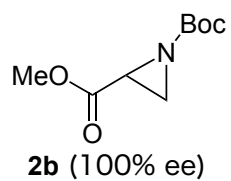

<chromatogram>

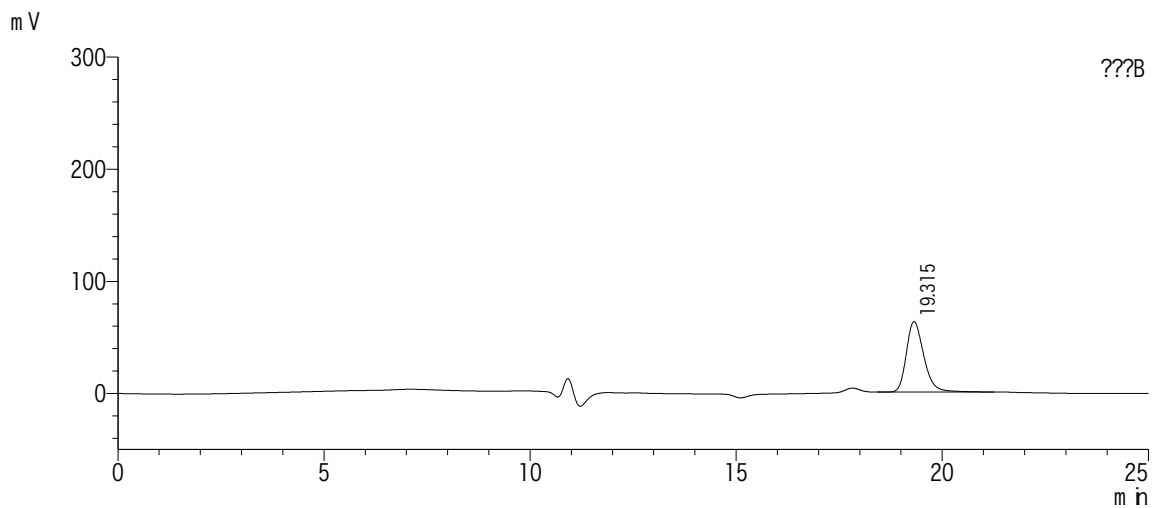

<peak report>

| ???'B | peak# | retention time | area    | height | area%   |
|-------|-------|----------------|---------|--------|---------|
|       | 1     | 19.315         | 1858897 | 62891  | 100.000 |
